# Supplementary material for: Nested Association Mapping of Stem Rust Resistance in Wheat Using Genotyping by Sequencing
Source: PubMed Central journal article supplement (PMC4870046; doi:10.1371/journal.pone.0155760), 2016-05-17

**Ada, StP12**

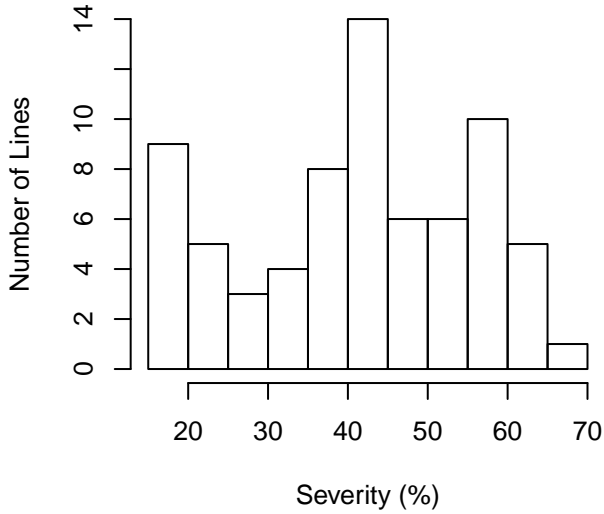

**Fahari, StP12**

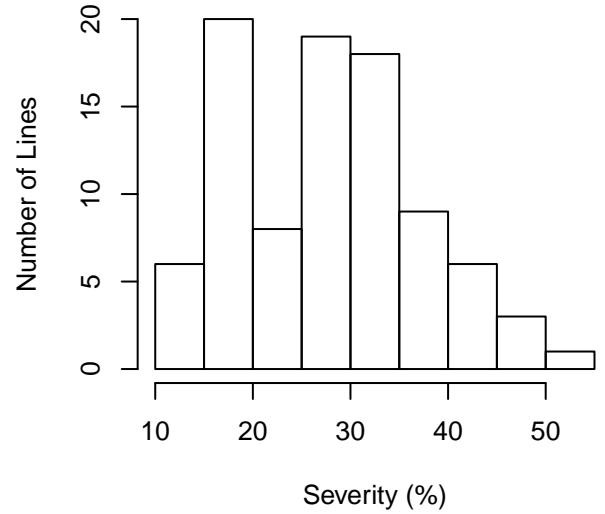

**Gem, StP12**

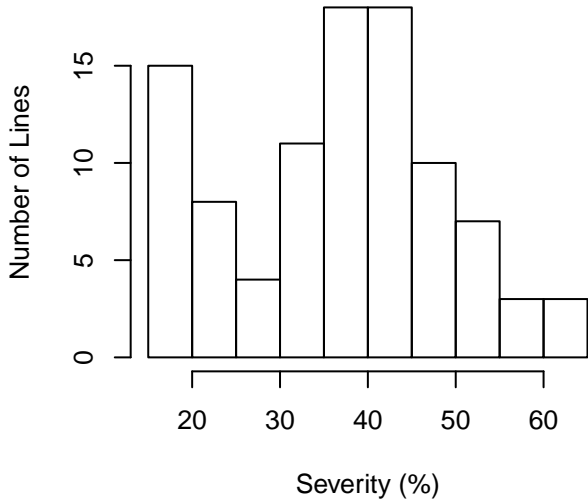

**Kudu, StP12**

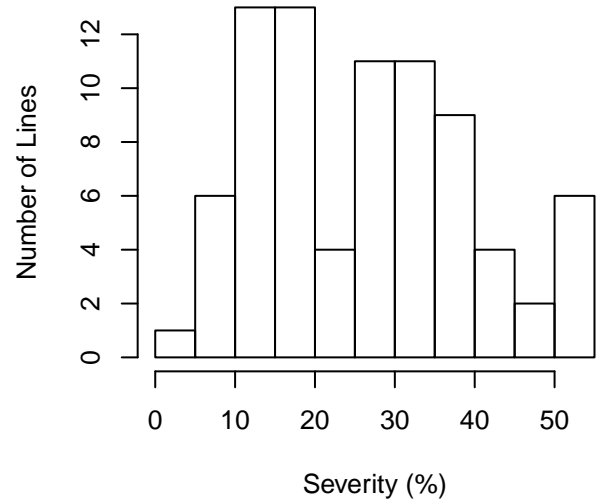

**Kulungu, StP12**

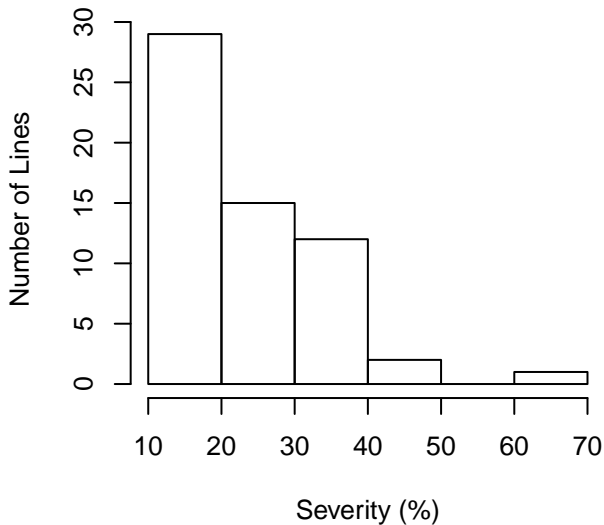

**Ngiri, StP12**

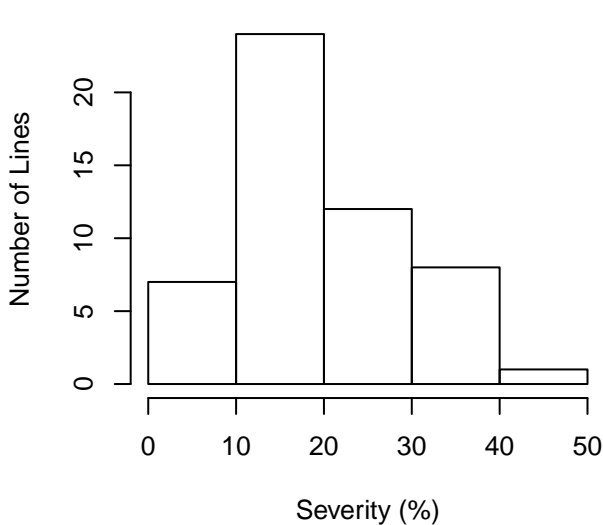

**Paka, StP12**

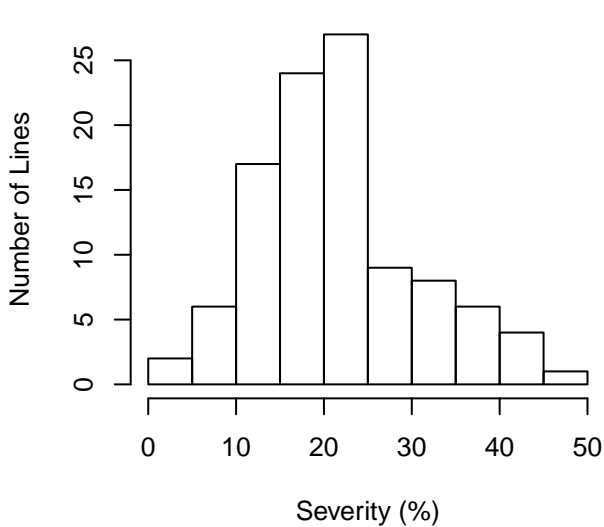

**Pasa, StP12**

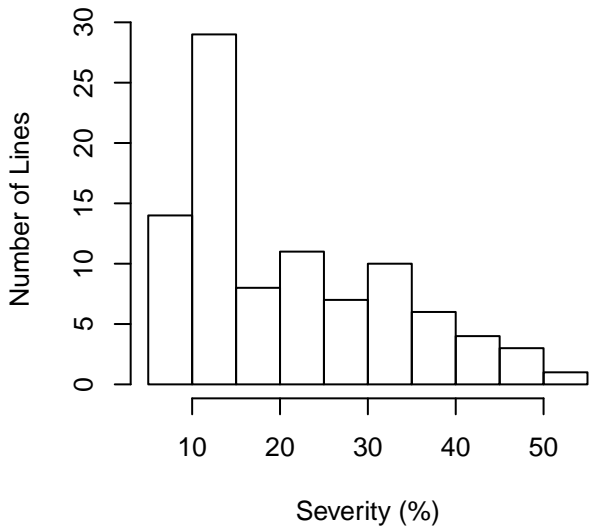

**Popo, StP12**

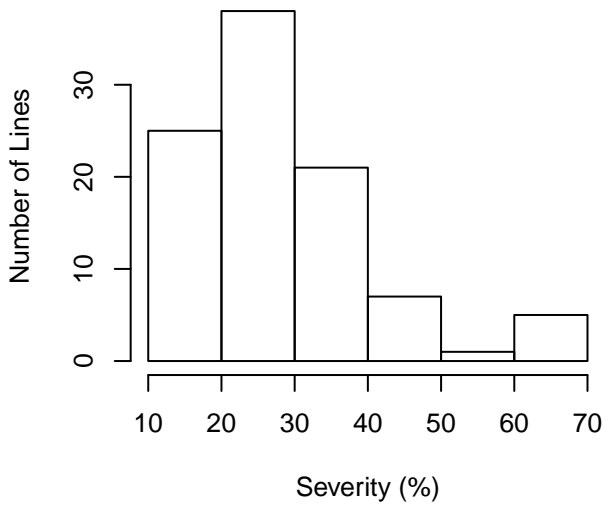

**Romany, StP12**

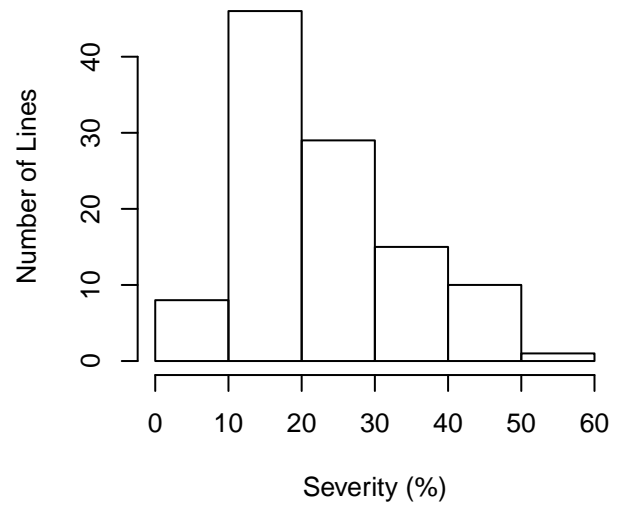

**Ada, SA12**

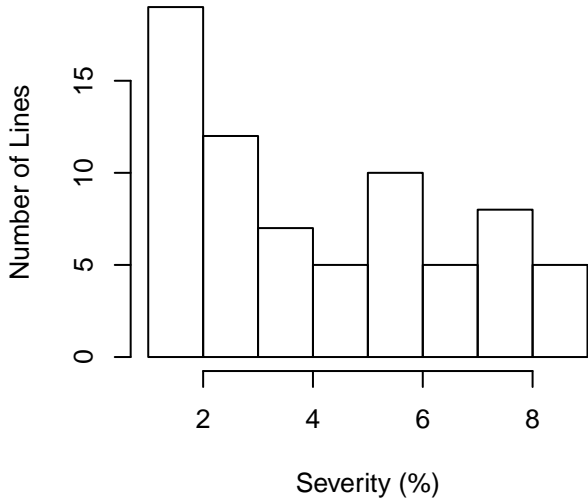

**Fahari, SA12**

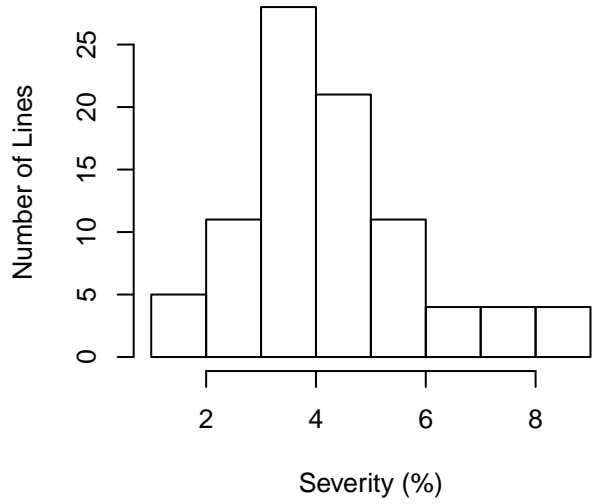

**Gem, SA12**

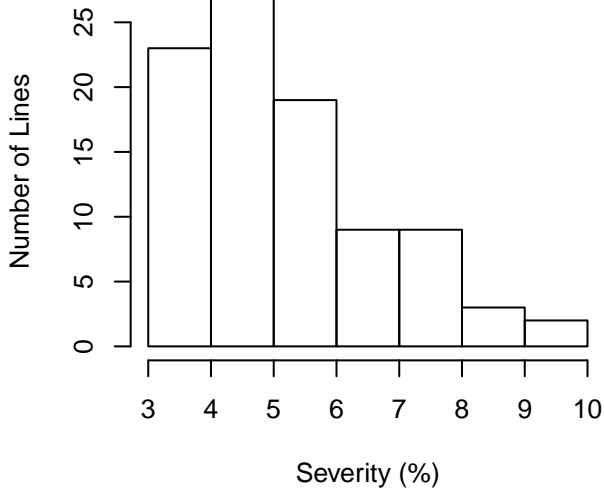

**Kudu, SA12**

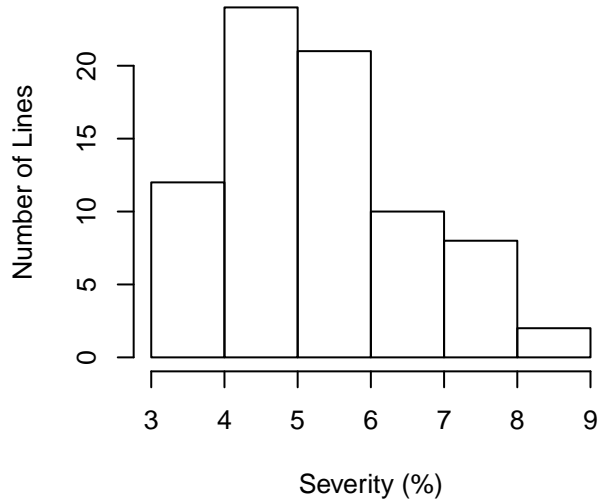

**Kulungu, SA12**

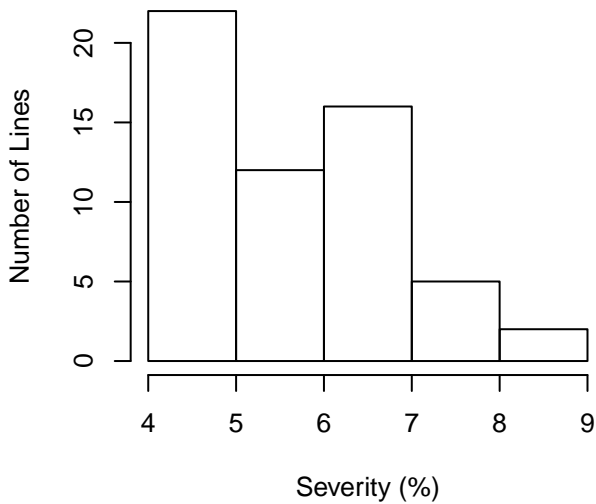

**Ngiri, SA12**

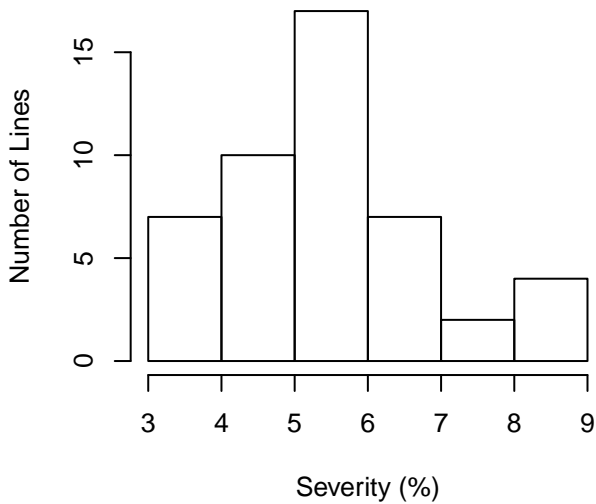

**Paka, SA12**

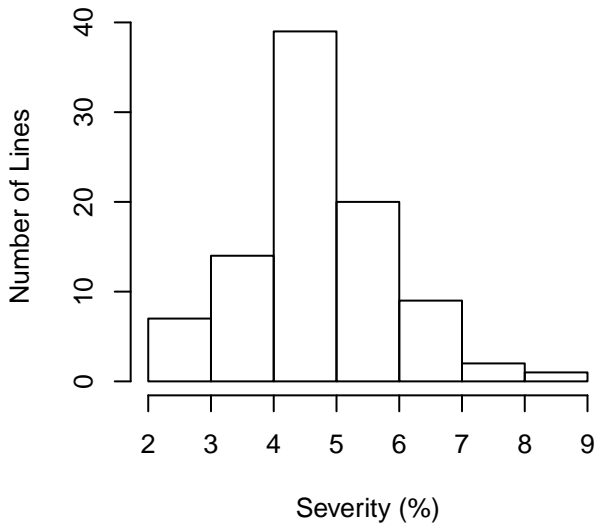

**Pasa, SA12**

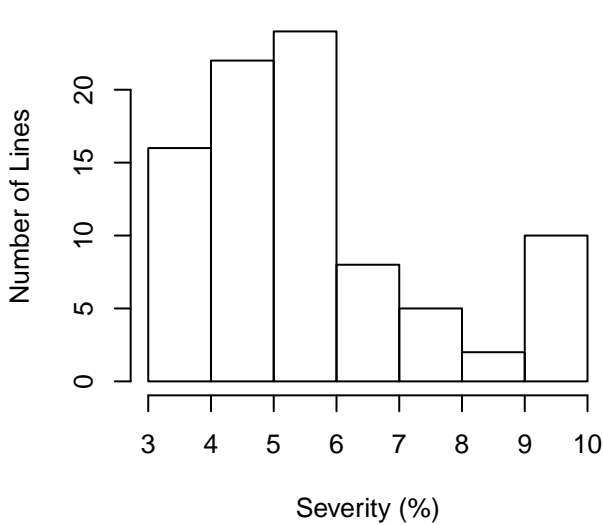

**Popo, SA12**

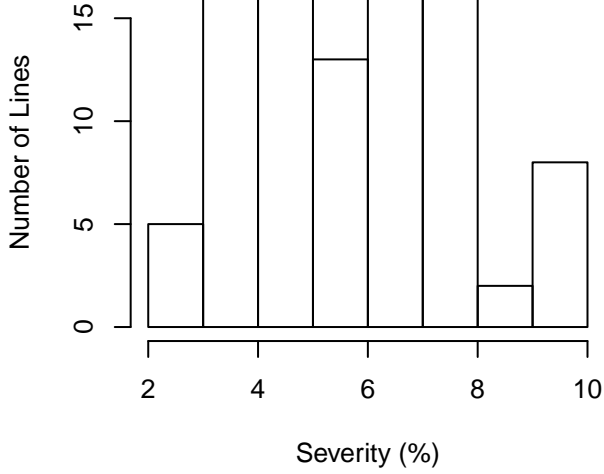

**Romany, SA12**

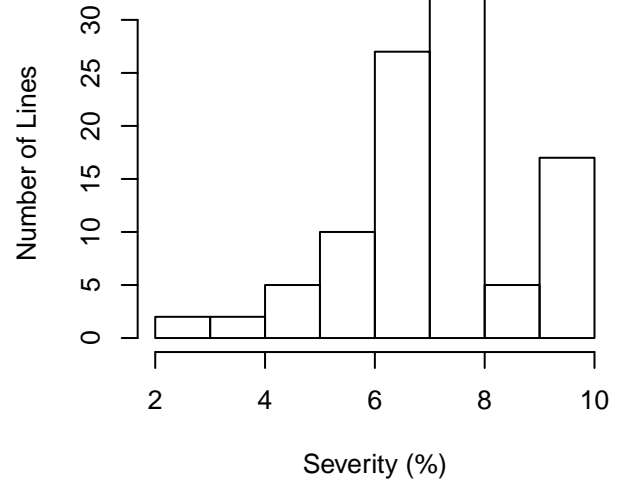

**Ada, StP13**

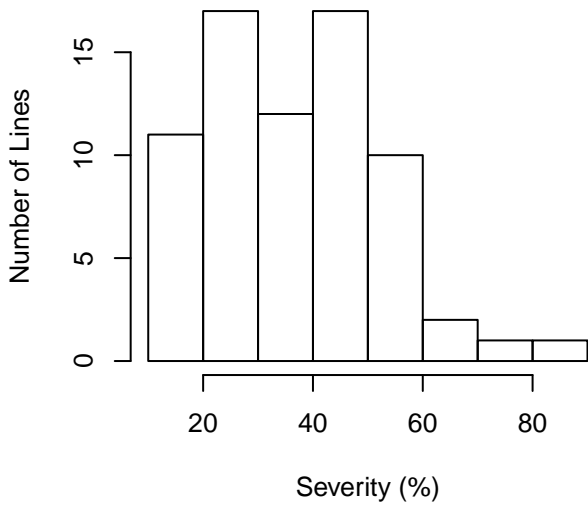

**Fahari, StP13**

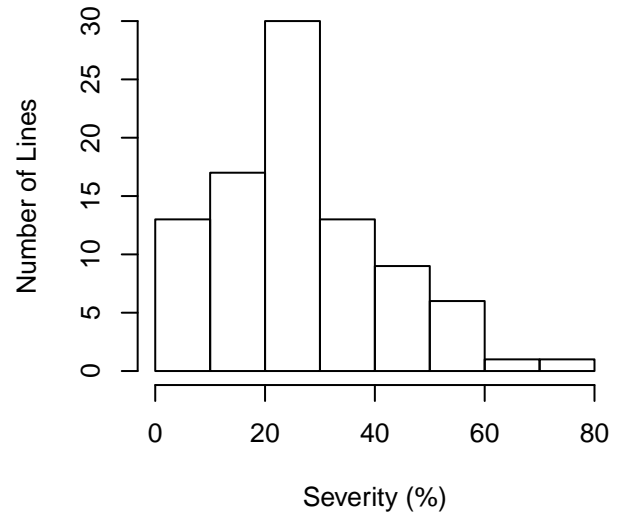

**Gem, StP13**

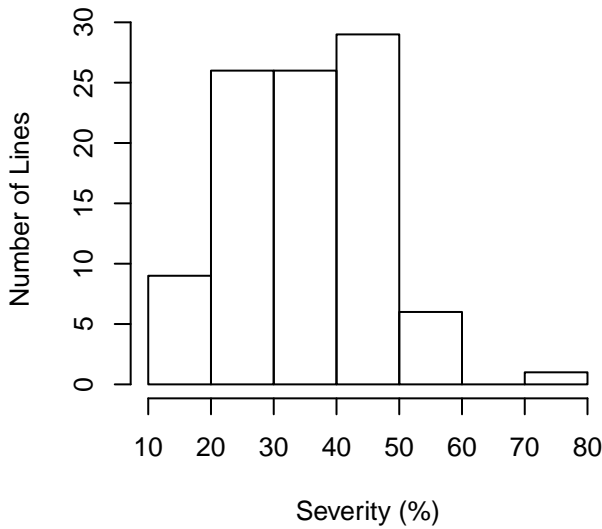

**Kudu, StP13**

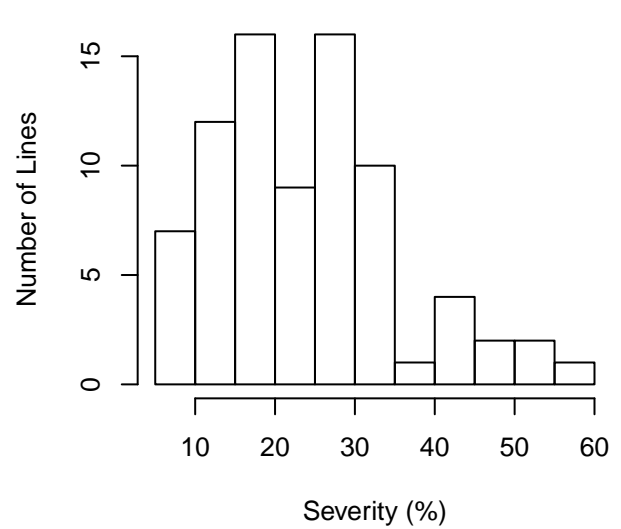

**Kulungu, StP13**

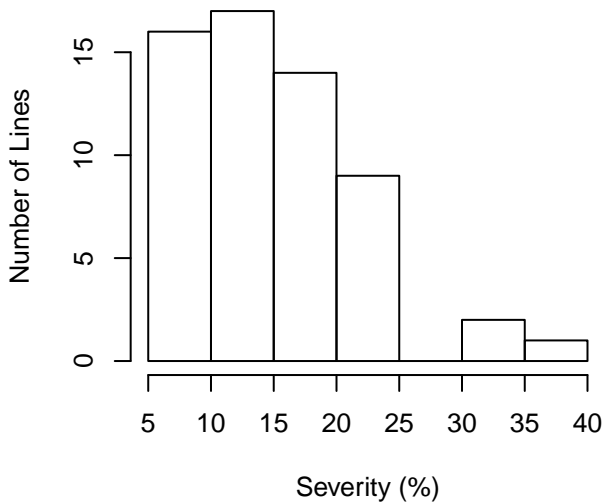

**Ngiri, StP13**

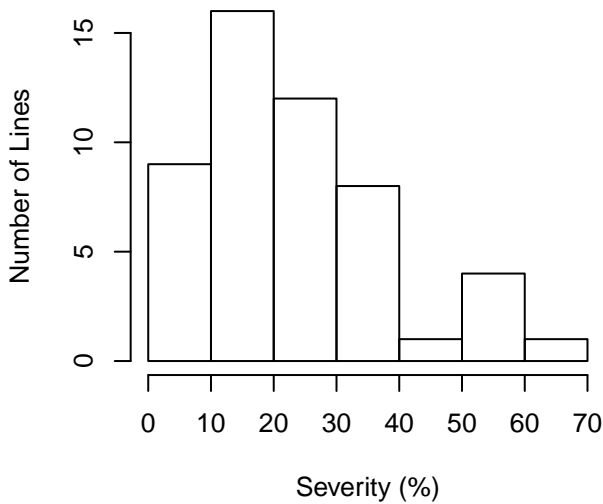

**Paka, StP13**

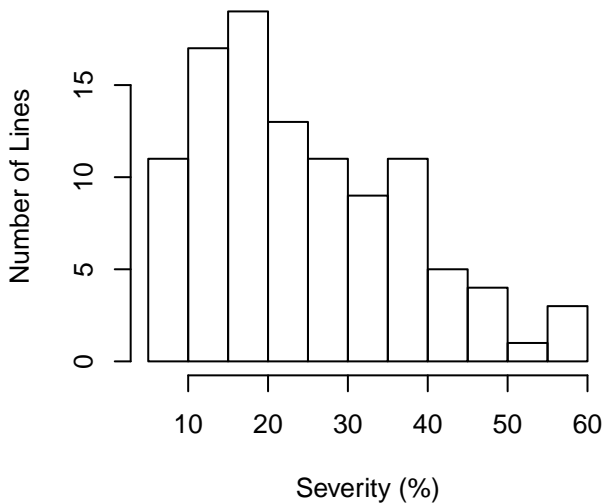

**Pasa, StP13**

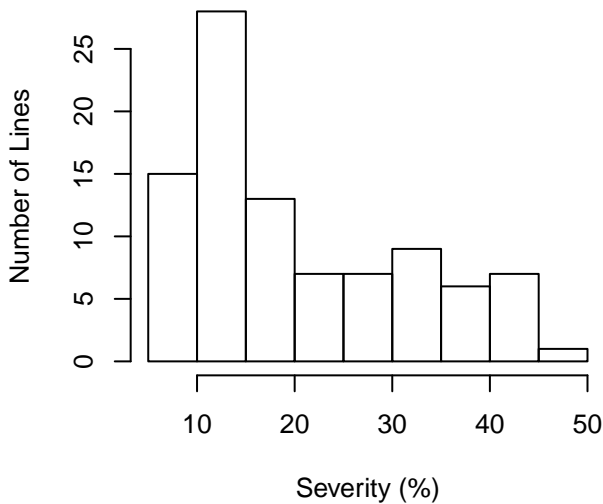



**Popo, StP13**

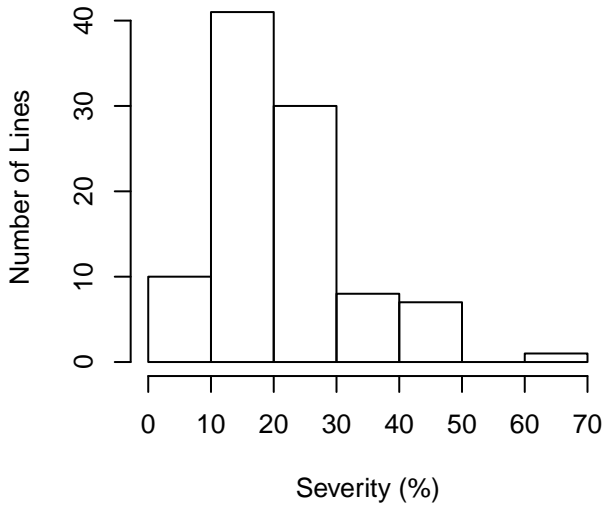

**Romany, StP13**

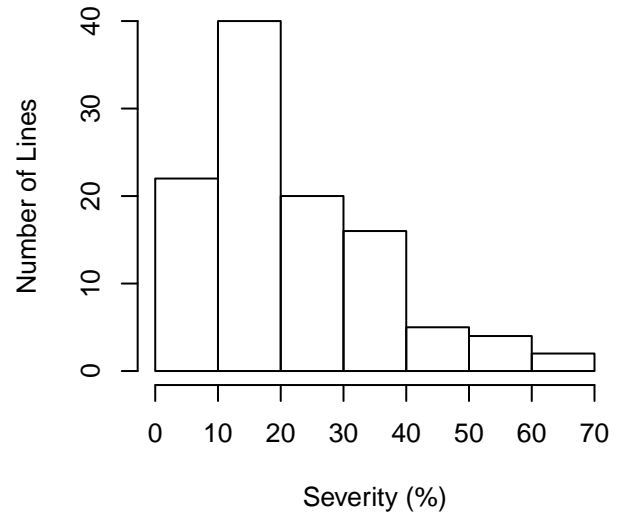

**Ada, Ken13**

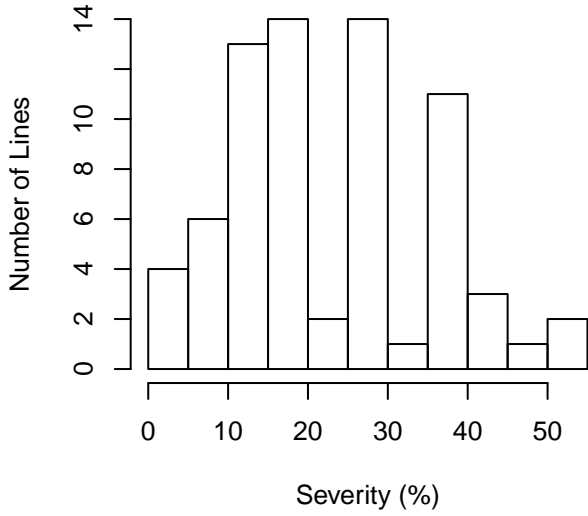

**Fahari, Ken13**

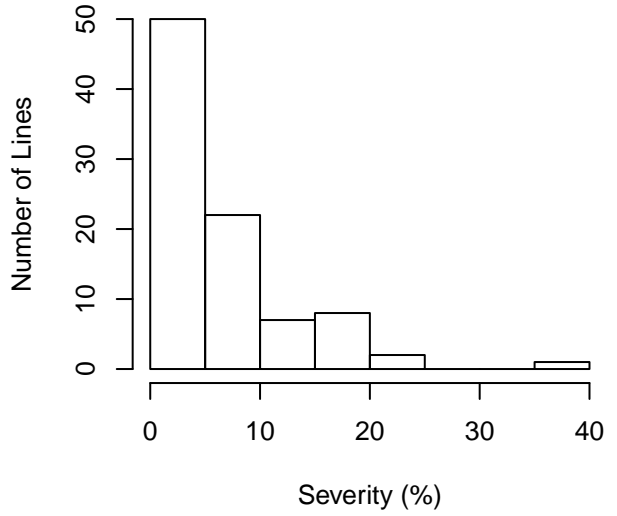

**Gem, Ken13**

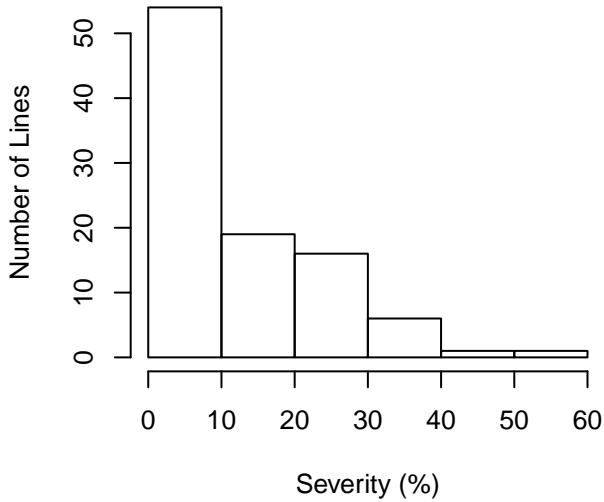

**Kudu, Ken13**

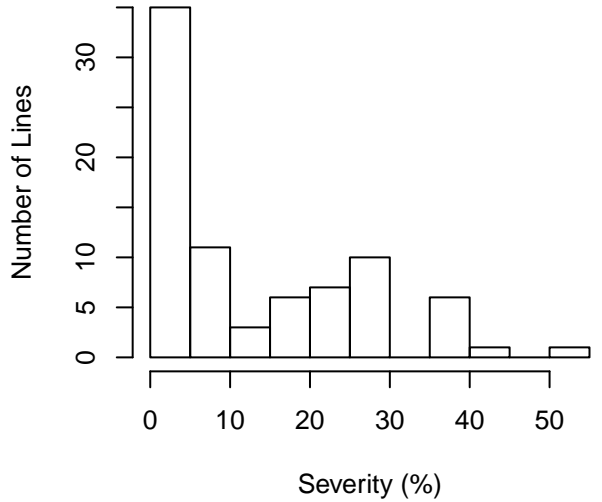

**Kulungu, Ken13**

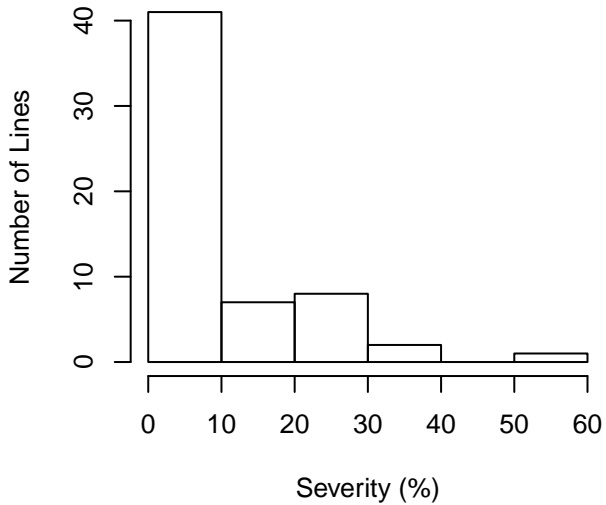

**Ngiri, Ken13**

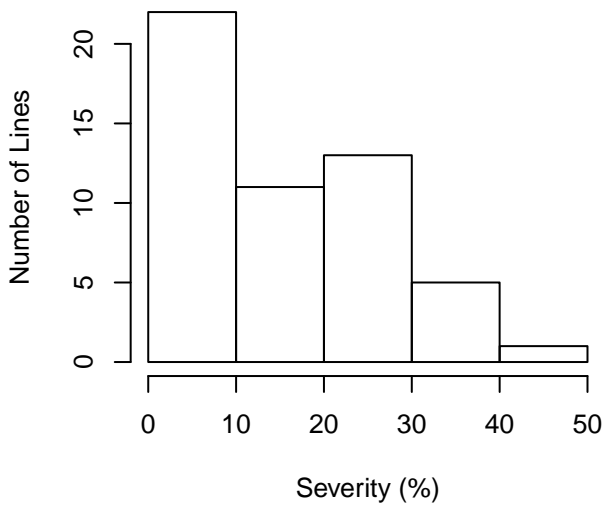

**Paka, Ken13**

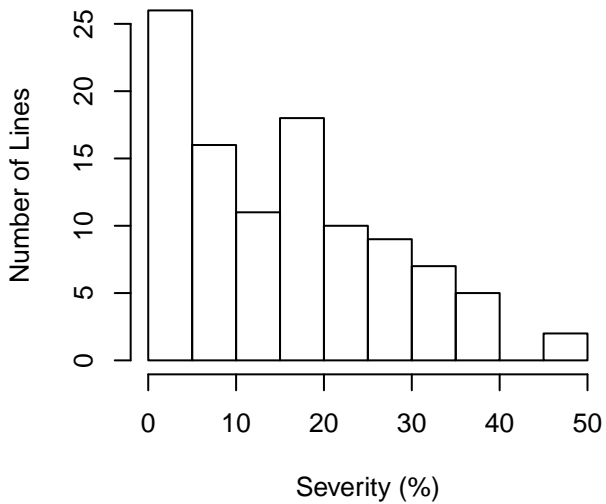

**Pasa, Ken13**

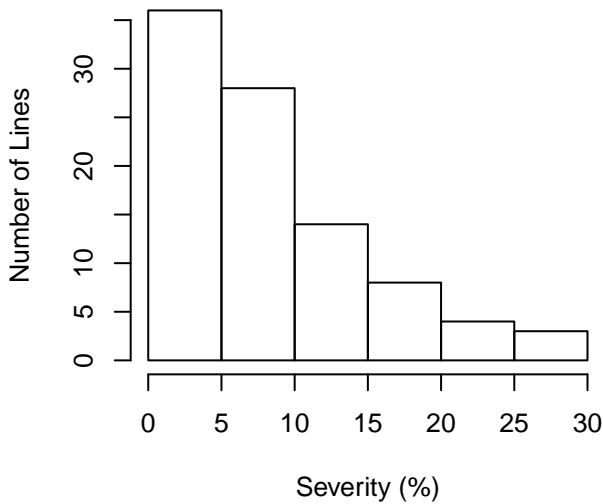

**Popo, Ken13**

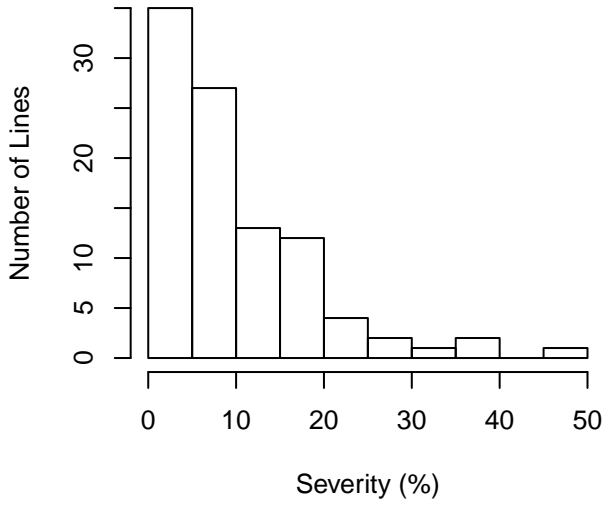

**Romany, Ken13**

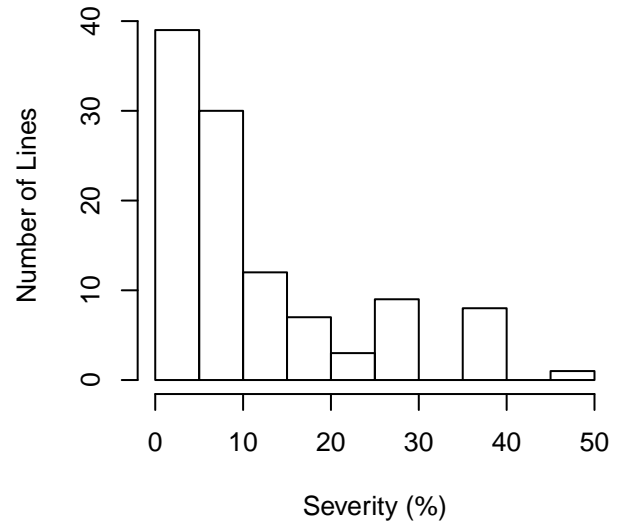

Supplement: pone.0155760.s004.pdf [file pone.0155760.s004.pdf]
