# Supplementary material for: Nested Association Mapping of Stem Rust Resistance in Wheat Using Genotyping by Sequencing
Source: PubMed Central journal article supplement (PMC4870046; doi:10.1371/journal.pone.0155760), 2016-05-17
Supplement: pone.0155760.s001.pdf [file pone.0155760.s001.pdf]

Ada Fahari Gem Kudu Kulungu Ngiri Paka Pasa Popo Romany

x

LMPG-6

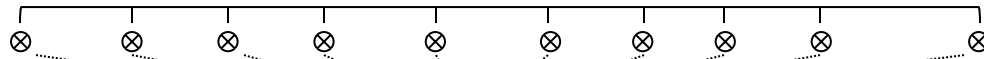

F<sub>6</sub> inbred lines in each population via SSD

DNA extraction from F<sub>6:7</sub> seedlings

Stem rust phenotyping

DNA Library preparation: Digestion using enzymes *Pst*I & *Msp*I; Barcode ligation

St Paul 2012

South Africa 2012

St Paul 2013

Kenya 2013

100 bp single-end Illumina sequencing

Data adjustment using mixed models

SNP calling using reference alignment to POPSEQ wheat reference sequence v2.2

Construction of linkage groups

Single Population QTL mapping: ICIM

Joint QTL mapping: JICIM
