# Supplementary material for: Nested Association Mapping of Stem Rust Resistance in Wheat Using Genotyping by Sequencing
Source: PubMed Central journal article supplement (PMC4870046; doi:10.1371/journal.pone.0155760), 2016-05-17

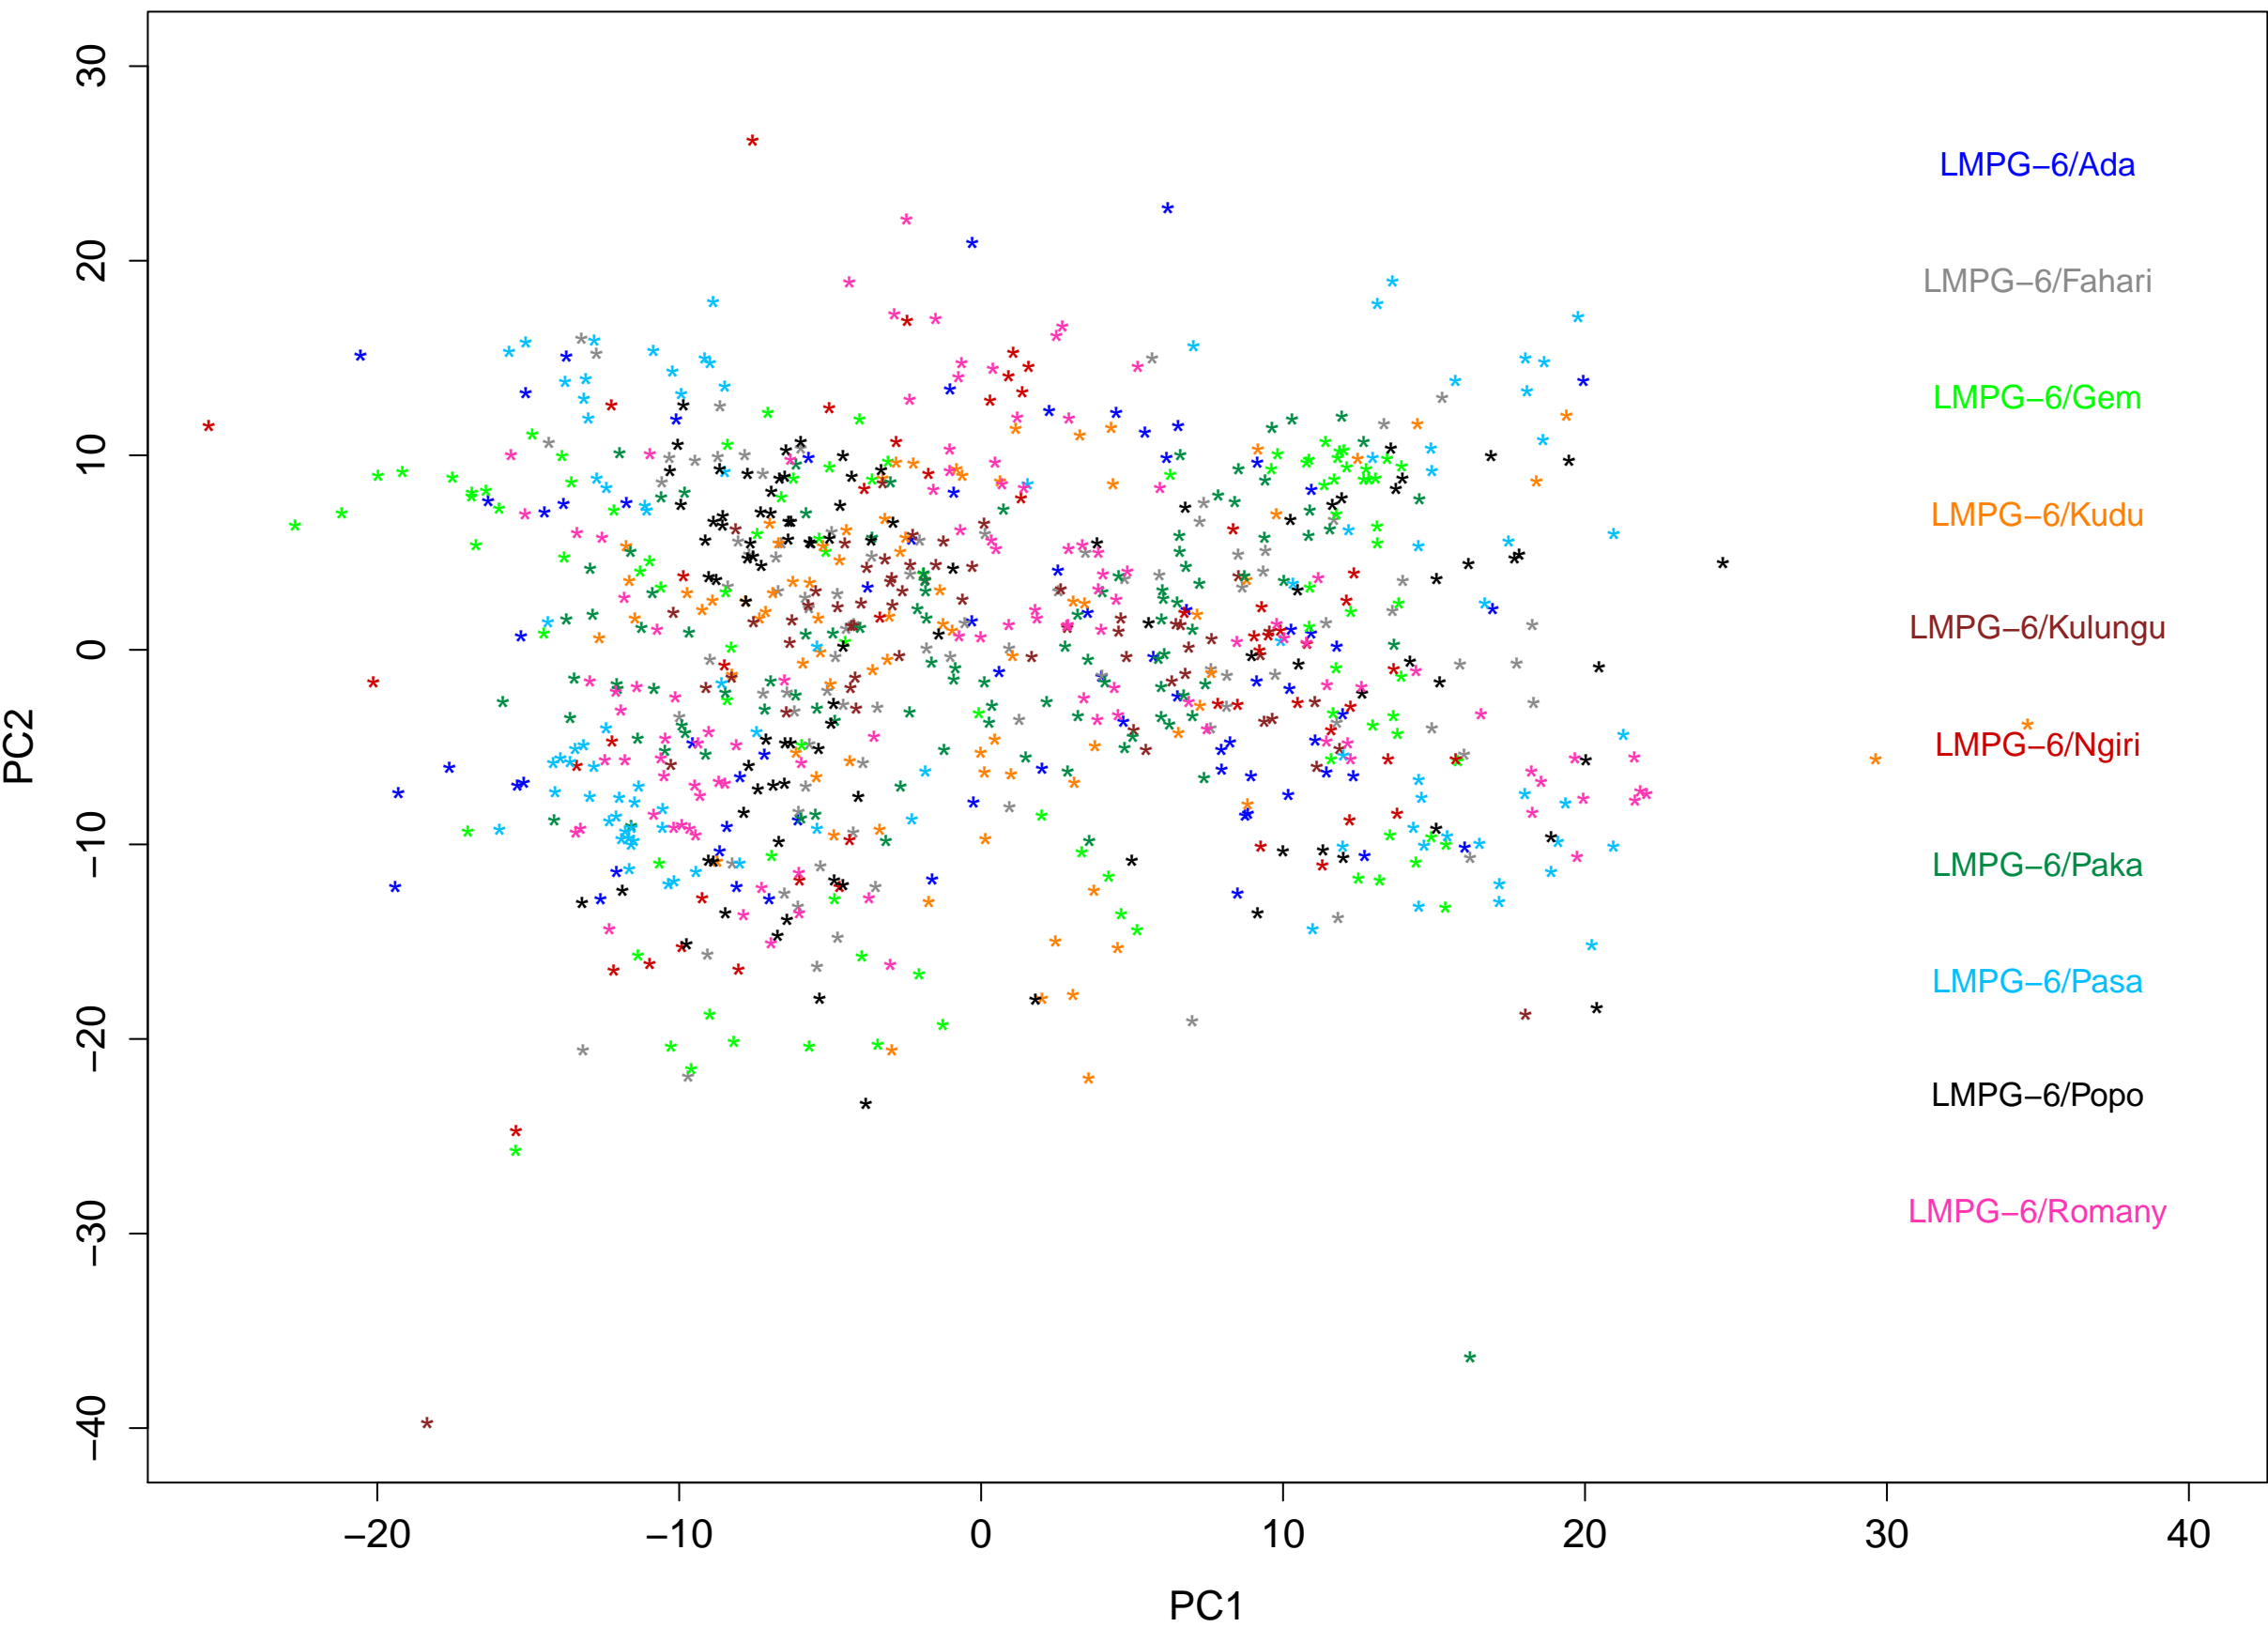

Supplement: pone.0155760.s002.pdf [file pone.0155760.s002.pdf]
