# Supplementary material for: Nested Association Mapping of Stem Rust Resistance in Wheat Using Genotyping by Sequencing
Source: PLoS One. 2016 May 17;11(5):e0155760. doi: 10.1371/journal.pone.0155760 (PMC4870046; doi:10.1371/journal.pone.0155760)
Supplement: S1 File — (XLSX) [file pone.0155760.s006.xlsx]

## Sheet: S-W test
St Paul 2012		South Africa 2012		St Paul 2013		Kenya 2013
> shapiro.test(StP2012$Sr)		> shapiro.test(SA2012$Sr)		> shapiro.test(StP2013$Sr)		> shapiro.test(Ken2013$Sr)
Shapiro-Wilk normality test		Shapiro-Wilk normality test		Shapiro-Wilk normality test		Shapiro-Wilk normality test
data: StP2012$Sr		data: SA2012$Sr		data: StP2013$Sr		data: Ken2013$Sr
W = 0.9318, p-value < 2.2e-16		W = 0.9662, p-value = 1.044e-12		W = 0.8875, p-value < 2.2e-16		W = 0.8518, p-value < 2.2e-16
> shapiro.test(StP2012$arcsine)		> shapiro.test(SA2012$arcsine)		> shapiro.test(StP2013$arcsine)		> shapiro.test(Ken2013$arcsine)
Shapiro-Wilk normality test		Shapiro-Wilk normality test		Shapiro-Wilk normality test		Shapiro-Wilk normality test
data: StP2012$arcsine		data: SA2012$arcsine		data: StP2013$arcsine		data: Ken2013$arcsine
W = 0.9108, p-value < 2.2e-16		W = 0.9654, p-value = 7.114e-13		W = 0.8482, p-value < 2.2e-16		W = 0.8283, p-value < 2.2e-16
> shapiro.test(StP2012$sqrt)		> shapiro.test(SA2012$sqrt)		> shapiro.test(StP2013$sqrt)		> shapiro.test(Ken2013$sqrt)
Shapiro-Wilk normality test		Shapiro-Wilk normality test		Shapiro-Wilk normality test		Shapiro-Wilk normality test
data: StP2012$sqrt		data: SA2012$sqrt		data: StP2013$sqrt		data: Ken2013$sqrt
W = 0.9768, p-value = 2.095e-10		W = 0.9673, p-value = 1.883e-12		W = 0.9652, p-value = 2.349e-13		W = 0.9519, p-value = 4.695e-16
> shapiro.test(StP2012$log)		> shapiro.test(SA2012$log)		> shapiro.test(StP2013$log)		> shapiro.test(Ken2013$log)
Shapiro-Wilk normality test		Shapiro-Wilk normality test		Shapiro-Wilk normality test		Shapiro-Wilk normality test
data: StP2012$log		data: SA2012$log		data: StP2013$log		data: Ken2013$log
W = 0.9484, p-value < 2.2e-16		W = 0.946, p-value < 2.2e-16		W = 0.9781, p-value = 5.207e-10		W = 0.9637, p-value = 1.043e-13

## Sheet: Sequencing result
	Ada	Fahari	Gem	Kudu	Kulungu	Ngiri	Paka	Pasa	Popo	Romany	LMPG-6	Parents scaled down by 1:10 meaning if ada had 100 reads, 100/10=10 is used to plot the value
Count	71	108	97	80	73	56	109	100	97	117
Mean	1.26969e+06	1.26797e+06	1.49365e+06	1.06739e+06	1.27593e+06	1.32931e+06	1.19496e+06	1.34567e+06	1.07548e+06	1.20183e+06
SD	194833	335388	448056	444063	392252	318347	262689	317787	193086	328778
Min	913742	724110	454262	591330	622523	763126	572116	799968	175443	720005
Q1	1147003	1059347	1246577	798764	1103309	1147381	1083717	1.17484e+06	980622	1014975
Median	1254024	1.20169e+06	1487449	890892	1211754	1.25886e+06	1162452	1308494	1069430	1139769
Q3	1410434	1.36345e+06	1694854	1194445	1340114	1403929	1265586	1.43326e+06	1181645	1294057
Max	1725219	2564464	2847185	2973379	2632858	2522139	2406690	3085988	1676769	2688345
Bottom	1147003	1059347	1246577	798764	1103309	1147381	1083717	1.17484e+06	980622	1014975
2Q Box	107021	142344	240872	92127.5	108445	111476	78735	133655	88808	124794
3Q Box	156410	161759	207405	303553	128360	145072	103134	124762	112215	154288
Whisker-	233261	335237	792315	207434	480786	384255	511601	374871	805179	294970
Whisker+	314785	1.20101e+06	1152331	1778934	1292744	1118210	1141104	1.65273e+06	495124	1394288
Offset	0.5	1.5	2.5	3.5	4.5	5.5	6.5	7.5	8.5	9.5	10.5
Parents	988586	1.62079e+06	2.1919e+06	795165	981088	929362	1.09979e+06	1.55744e+06	1.55828e+06	1.33483e+06	3.13811e+06
	Population											Parent lines	No. of reads/parent
	ada	fahari	gem	kudu	kulungu	ngiri	paka	pasa	popo	romany
No. of reads/line	1470366	1100785	1044442	874286	1382685	1151303	658424	1261654	1453886	1215636		ada	9885856
	1144201	838875	1483570	765699	1256300	1252183	1212135	1350759	1139069	788156		fahari	16207902
	1150830	1304115	1788757	1905370	1428956	1269956	1349708	1432614	1118315	1324621		gem	21918966
	1419416	1188973	2008763	1019962	1282355	2522139	1249253	1310259	1048996	1420487		kudu	7951649
	1401452	1112522	1545770	623243	1424347	2237882	1154285	1414044	1065162	993501		kulungu	9810878
	1332665	1038985	1040080	770245	1141124	1265532	1252405	1234071	1181645	1066296		ngiri	9293620
	913742	1390774	1375025	2065021	1007723	1091661	2406690	1059554	887069	1139769		paka	10997882
	1453420	1499042	1045429	823510	1014772	1654855	1124887	1325178	1132307	852187		pasa	15574394
	986607	1361934	1487449	808539	1199072	1093867	1153772	1172882	1066921	1098556		popo	15582783
	1346374	1373390	1296083	1129101	2213844	1272164	806693	1153196	951177	1095150		romany	13348322
	1185620	1537287	2087547	861054	1334923	1295029	1191100	1307850	1069430	1127040		lmpg	31381071
	1156564	1014978	1662415	824065	1302421	1083674	NA	1148863	1159805	1297638
	1040819	1255956	1088164	1914364	1473330	1152263	1129266	1596225	1202663	884233
	1186604	1045084	1344824	2038643	1150071	1180678	1421382	1070044	1210155	1158145
	1505202	879057	718690	2973379	863563	1083787	949696	1407929	1084590	943687
	1121699	879502	1518305	1263982	1494486	1207019	1477292	1208467	959742	1044211
	1255444	1758559	1184773	1855797	1350381	2290806	1083717	1351586	881327	1074149
	1208997	1036184	749939	1351592	1103309	1034222	1104306	1283624	1186016	1277751
	1311392	1101589	1512765	981579	1231761	1608542	1264177	1072084	1007535	997120
	960735	1278532	1296055	778700	1487516	1394073	2368483	1393489	817840	1294253
	1523023	1045066	1627387	997102	1271348	1683190	1382674	1122168	1050592	1141086
	1151479	1501835	1327582	628053	1338255	1240658	1239794	1395652	1062869	1418555
	1251678	1264980	1246577	790074	1365894	1135615	1129537	2517820	1211257	1310812
	1261516	1162596	2140934	1099030	1550336	1248042	1223543	1376842	1266739	1127579
	1254024	1195632	1787599	1630446	1141483	1398754	572116	1308345	1248931	1160787
	1195846	2358228	1282805	662186	1203842	1091934	1044513	1209527	1032730	1112565
	1343280	1212071	1097706	591330	1175318	1086310	1198924	1156224	1138424	1269214
	1111586	967141	1362758	983410	1158531	1192503	1141184	1446546	934765	1272207
	1216358	1241145	1498471	1766410	1049508	1439513	1114541	1105241	1132537	2541421
	1188643	2208286	1262149	678232	1267122	1387934	1244700	1177622	653528	1300953
	1468850	939879	1563342	738776	1234512	1443204	917847	1277920	1345871	1686615
	1274062	1201765	1731774	978957	1122358	1346838	1252781	1539097	1239752	841272
	1353597	1075071	1641218	2254821	1216148	1301872	927985	1324833	1198498	1460727
	945353	1115416	1385751	825248	968835	1251429	1223163	1548916	1002327	2301999
	996529	1085850	1191646	992507	1247303	1419454	1013186	1275460	1128762	1126532
	1179091	1385439	1691199	703674	1211754	832900	1502403	1564816	1025396	1013009
	1116127	1201616	1630123	1462813	1065720	763126	1043499	1237484	1120413	1136899
	1419974	1207184	511594	1156828	1183919	1545419	1190747	1403888	1676769	1014975
	938658	1215259	1483887	839282	2249639	1955728	1155530	2641372	993395	799770
	1157685	1034651	1314587	808537	2475837	1198602	1186150	1443036	1175929	1294057
	1479296	959654	1694854	915963	1167169	1248053	2341680	1291937	924042	1078298
	1260346	1023303	1487736	1691894	1465689	1363254	1188077	1207867	1042728	1071594
	1300089	1242150	1439261	1477006	2632858	1424737	974037	1291079	1050737	1380295
	1198938	1074310	454262	967242	1318797	1175114	930816	1408785	1156421	1005865
	943903	1130024	1599194	701483	1126906	1056385	937201	1484050	1025657	1227473
	1067185	1069773	1305778	815838	622523	1333459	1454319	1478335	1135822	939809
	1357180	1196894	551189	943732	1220534	1129068	1103264	1117426	889033	1149516
	1452188	1257712	1495731	1131151	1269212	1216135	1402159	1163179	946815	1538829
	1320623	1105023	1368519	1333901	1191196	1206965	1514484	964848	770646	2688345
	1680492	1342116	1493457	1681897	1372511	1284738	989550	1651730	1129033	971892
	1206745	1371208	1569783	895670	629086	1012837	1152370	1142852	175443	1177403
	1140006	1110846	2684946	917900	892288	1396969	1297172	1255344	1216354	720005
	1659719	1191197	1933404	835233	1100871	1532855	1224256	1367661	812947	1362796
	1322734	1094972	1537272	596088	967307	1362659	991919	1288642	966312	1604719
	1087419	1469492	2255802	905251	686022	1126821	1087377	1694435	980622	1250752
	1545461	2564464	1661367	1171266	1183614	1466923	1373547	1072508	823106	1099621
	1060113	1178138	1236592	848123	1410433	NA	1371759	1972339	1165906	832081
	1319074	1059281	1153913	728638	1340114	NA	1101124	1410864	1352040	976904
	1517981	1168132	616542	828190	1064620	NA	1156672	1347371	1322103	1326954
	1725219	1192784	1237082	845308	1279580	NA	NA	1519576	1287234	1654529
	1699916	1022226	887171	795589	2344200	NA	1155119	1349876	1336645	906667
	1149805	1039922	1952480	781176	937472	NA	1117649	1736112	1066361	1086261
	1497237	1245068	1270776	1357022	1071294	NA	1196192	3085988	987892	841104
	1578960	2284990	2422773	1338369	1166984	NA	1080672	1222961	711497	1139834
	1238761	1319987	1478621	696180	1218978	NA	1290158	1344766	860765	1301063
	1031742	1467382	1254616	944046	647997	NA	1070203	1275417	1071436	1004228
	1102804	1029146	1322155	870805	1188896	NA	905753	1221254	1161154	1118477
	1182350	724110	1434160	1108548	1287044	NA	1068757	1483534	1178620	1151200
	1514368	1234033	1065801	1562542	2475940	NA	1309184	1097278	1102430	983387
	1297764	1958143	2072348	694763	1046954	NA	1071457	1314118	984325	1231172
	1309911	1336757	1676408	806720	898781	NA	1151641	1588834	1085628	1294369
	NA	819347	2847185	993967	1109693	NA	1239078	1424655	1096979	962462
	NA	984733	1606162	886114	1167001	NA	1239137	1321652	1121400	1140186
	NA	1261041	1349690	834060	NA	NA	1286654	1005487	931504	1013637
	NA	1137914	1638599	799823	NA	NA	1414865	1005375	1034710	1181405
	NA	1060699	1754068	840959	NA	NA	1235822	1252681	1004963	1270669
	NA	1100812	2257274	837023	NA	NA	935495	950031	889398	1247105
	NA	1217800	1125565	731001	NA	NA	1235417	1175491	925032	1105584
	NA	1297767	1122655	1377394	NA	NA	1201053	1521763	1082154	1084894
	NA	916644	1040197	687653	NA	NA	1435200	1342794	870341	1142571
	NA	1444173	1105091	NA	NA	NA	1265586	1243099	1028364	872331
	NA	936949	1751588	NA	NA	NA	938479	1393671	1195372	1264105
	NA	1049513	2284917	NA	NA	NA	1346440	1435183	1467333	1204134
	NA	963390	1212223	NA	NA	NA	1111201	1267681	1354145	1375504
	NA	1024888	1530750	NA	NA	NA	801521	1640420	1013781	1068476
	NA	1194187	1593848	NA	NA	NA	1163230	1455392	1088054	1206812
	NA	2219075	666293	NA	NA	NA	1091134	1058007	878891	1135603
	NA	1479360	1253134	NA	NA	NA	1162452	1084640	1185043	953748
	NA	1654334	2268538	NA	NA	NA	1018405	1308643	1276206	1119584
	NA	1367996	1546540	NA	NA	NA	1317546	799968	1449378	1089223
	NA	1059369	2169677	NA	NA	NA	1401777	964087	828252	833013
	NA	1256192	1997908	NA	NA	NA	1107853	1193738	1193514	1151269
	NA	2315561	1362902	NA	NA	NA	1231544	1454105	976098	890334
	NA	1076987	1912855	NA	NA	NA	1548213	1038581	1046066	1019977
	NA	902658	2068133	NA	NA	NA	997529	1351774	1049925	1885760
	NA	980460	1831499	NA	NA	NA	964613	894388	1052812	925108
	NA	1883118	1914592	NA	NA	NA	1234852	1177519	1299348	974369
	NA	1248450	NA	NA	NA	NA	1354494	1590837	NA	1050856
	NA	1616973	NA	NA	NA	NA	1250479	1165317	NA	1136480
	NA	1275905	NA	NA	NA	NA	1297238	1571826	NA	1314543
	NA	1227739	NA	NA	NA	NA	1162029	NA	NA	1252354
	NA	1305704	NA	NA	NA	NA	1098430	NA	NA	1384439
	NA	1561322	NA	NA	NA	NA	1087443	NA	NA	2636793
	NA	1556637	NA	NA	NA	NA	1152473	NA	NA	1157820
	NA	1479374	NA	NA	NA	NA	906971	NA	NA	1844912
	NA	1293255	NA	NA	NA	NA	1138320	NA	NA	1460609
	NA	1445657	NA	NA	NA	NA	1227107	NA	NA	991448
	NA	1245800	NA	NA	NA	NA	847452	NA	NA	1389071
	NA	NA	NA	NA	NA	NA	1161502	NA	NA	1283150
	NA	NA	NA	NA	NA	NA	1304118	NA	NA	1064643
	NA	NA	NA	NA	NA	NA	1266273	NA	NA	1062622
	NA	NA	NA	NA	NA	NA	NA	NA	NA	774419
	NA	NA	NA	NA	NA	NA	NA	NA	NA	1516159
	NA	NA	NA	NA	NA	NA	NA	NA	NA	1097217
	NA	NA	NA	NA	NA	NA	NA	NA	NA	1136509
	NA	NA	NA	NA	NA	NA	NA	NA	NA	1263363
	NA	NA	NA	NA	NA	NA	NA	NA	NA	1139914

## Sheet: SNP info
Population	Unfiltered SNPs (Samtools output)	Filtered SNPs (Parents polymorphic and had nucleotide base calls)	Missing data, min %	Missing data, max %
Ada	4944077	39739	0	100
Fahari	5618061	40533	0	100
Gem	3970528	32742	0	100
Kudu	3321326	29651	0	100
Kulungu	4134202	31835	0	100
Ngiri	4010637	35749	0	100
Paka	5885791	35046	0	100
Pasa	5561549	39113	0	100
Popo	6138488	41418	0	100
Romany	6386191	40198	0	100

## Sheet: Linkage Groups
Group	Chromosome	No. of SNP Markers	Length (cM)
1	1A	614	136.54
2	1B	699	113.97
3	1D	377	84.55
4	2A	670	145.54
5	2B	856	187.36
6	2D	264	83.59
7	3A	451	119.67
8	3B	1218	190.53
9	3D	138	33.38
10	4A	646	98.07
11	4B	735	71.92
12	4D	248	40.02
13	5A	385	111.16
14	5B	784	84.82
15	5D	325	68.69
16	6A	613	71.52
17	6B	499	61.67
18	6D	346	43.4
19	7A	492	80.3
20	7B	468	65
21	7D	393	27.87
	Whole Genome	11221	1919.57

## Sheet: ICIM
Population	Env	Chrom	Pos	Left Marker	Right Marker	LOD	R2 (%)	Add
LMPG-6/Ada	SA12	1	80	1A_118679223	1A_231674269	3.689	3.3012	0.0452
LMPG-6/Ada	SA12	4	63.07	2A_181693094	2A_72656726	4.4387	3.29742	0.045
LMPG-6/Ada	SA12	6	29	2D_110200285	2D_104155378	3.5155	3.35513	0.0455
LMPG-6/Ada	StP12	4	145.07	2A_254280385	2A_226128547	3.5194	7.8638	0.0541
LMPG-6/Ada	StP12	19	8	7A_89695433	7A_20402700	4.5989	19.5617	-0.0936
LMPG-6/Ada	StP13	5	60	2B_328392028	2B_344339504	3.0021	3.1484	-0.137
Population	Env	Chrom	Pos	Left Marker	Right Marker	LOD	R2 (%)	Add
LMPG-6/Fahari	SA12	1	35.64	1A_184159449	1A_50973716	15.3617	38.7099	0.2165
LMPG-6/Fahari	StP12	14	39.19	5B_97013481	5B_232827325	3.3238	9.2114	0.0838
Population	Env	Chrom	Pos	Left Marker	Right Marker	LOD	R2 (%)	Add
LMPG-6/Gem	StP12	1	78.64	1A_28683508	1A_134714776	5.4919	1.2859	-0.1489
LMPG-6/Gem	StP12	2	70.28	1B_198011199	1B_216936074	5.6941	1.2598	0.149
LMPG-6/Gem	StP12	3	9.43	1D_88637303	1D_99992022	6.3328	1.292	-0.1436
LMPG-6/Gem	StP12	3	14.43	1D_96967944	1D_11687876	4.2613	1.2987	-0.1459
LMPG-6/Gem	StP12	3	20.43	1D_96967944	1D_11687876	4.0107	1.257	0.1464
LMPG-6/Gem	StP12	5	99.58	2B_256808855	2B_108192850	5.8069	1.3154	-0.1473
LMPG-6/Gem	StP12	6	58	2D_132599986	2D_53345811	3.5721	1.3298	-0.1467
LMPG-6/Gem	StP12	8	178.19	3B_286051442	3B_472432742	4.2955	1.2848	0.1477
LMPG-6/Gem	StP12	14	23	5B_43431296	5B_9336052	3.5745	1.2951	-0.1487
LMPG-6/Gem	StP12	14	53	5B_257695597	5B_155513783	4.9415	1.283	-0.1423
LMPG-6/Gem	StP12	17	42.28	6B_25347754	6B_76385501	3.6959	1.253	-0.1402
LMPG-6/Gem	StP12	19	2.95	7A_92272971	7A_134846357	3.9427	1.0538	-0.1464
LMPG-6/Gem	StP12	20	14.19	7B_174496679	7B_92044411	5.5551	1.2729	0.1404
LMPG-6/Gem	StP13	8	121.19	3B_496875398	3B_554937272	5.697	19.8851	-0.0675
Population	Env	Chrom	Pos	Left Marker	Right Marker	LOD	R2 (%)	Add
LMPG-6/Kudu	StP12	8	124.19	3B_591992271	3B_909961	3.6496	17.1492	-0.1196
LMPG-6/Kudu	StP12	21	20.41	7D_136422533	7D_101040993	3.0143	14.1287	-0.1116
LMPG-6/Kudu	StP13	8	124.19	3B_591992271	3B_909961	4.2131	29.2188	-0.0875
LMPG-6/Kudu	Ken13	8	124.19	3B_591992271	3B_909961	3.0968	10.9269	-0.1169
LMPG-6/Kudu	Ken13	21	21.41	7D_136422533	7D_101040993	3.0588	15.574	-0.145
Population	Env	Chrom	Pos	Left Marker	Right Marker	LOD	R2 (%)	Add
LMPG-6/Kulungu	StP13	15	35.44	5D_82148041	5D_142515808	3.936	7.4045	-0.0964
LMPG-6/Kulungu	Ken13	1	34.64	1A_64961094	1A_101708352	4.1186	1.8425	-0.1516
LMPG-6/Kulungu	Ken13	1	53.64	1A_164760255	1A_101708407	3.9419	1.9025	-0.1473
LMPG-6/Kulungu	Ken13	2	53.14	1B_79349603	1B_285396600	5.3453	2.1078	-0.1523
LMPG-6/Kulungu	Ken13	4	58.3	2A_222143148	2A_65470424	3.0193	0.705	-0.2103
LMPG-6/Kulungu	Ken13	6	25.24	2D_75251875	2D_86925570	4.3681	2.094	-0.1531
LMPG-6/Kulungu	Ken13	7	47.45	3A_2961139	3A_51516157	4.0133	2.0364	-0.1529
LMPG-6/Kulungu	Ken13	8	163.19	3B_90236055	3B_709715497	3.2568	1.861	-0.1366
LMPG-6/Kulungu	Ken13	10	75.69	4A_178612953	4A_50031476	4.0059	2.0882	-0.1514
LMPG-6/Kulungu	Ken13	12	21.3	4D_50470445	4D_59436083	3.5127	1.9346	-0.1572
LMPG-6/Kulungu	Ken13	15	48.44	5D_27462012	5D_91682679	3.3291	1.8797	-0.1576
LMPG-6/Kulungu	Ken13	19	7.95	7A_5596592	7A_99620467	4.124	1.9388	-0.1573
Population	Env	Chrom	Pos	Left Marker	Right Marker	LOD	R2 (%)	Add
LMPG-6/Ngiri	SA12	2	68.14	1B_280577624	1B_179945840	3.2105	1.3876	0.0177
Population	Env	Chrom	Pos	Left Marker	Right Marker	LOD	R2 (%)	Add
LMPG-6/Paka	SA12	3	56.43	1D_28498118	1D_40608345	4.7064	4.0955	0.1906
LMPG-6/Paka	SA12	5	180.58	2B_101605217	2B_119654206	3.2577	5.9016	0.0851
LMPG-6/Paka	StP12	2	69	1B_291999130	1B_24445471	3.1991	9.203	-0.1215
LMPG-6/Paka	Ken13	5	76.58	2B_246544730	2B_204782438	4.2789	1.5836	-0.0558
LMPG-6/Paka	Ken13	14	24.19	5B_137018680	5B_161421910	3.5567	4.5634	-0.0952
Population	Env	Chrom	Pos	Left Marker	Right Marker	LOD	R2 (%)	Add
LMPG-6/Pasa	SA12	16	21	6A_41412787	6A_49007339	11.6797	6.7095	-0.0191
LMPG-6/Pasa	StP12	8	109.19	3B_647995685	3B_584832142	7.1196	9.9097	-0.0511
LMPG-6/Pasa	StP12	19	46.95	7A_142198625	7A_174219817	3.6173	9.6291	-0.0547
LMPG-6/Pasa	StP13	8	108.19	3B_647995685	3B_584832142	9.8248	10.9291	-0.0544
Population	Env	Chrom	Pos	Left Marker	Right Marker	LOD	R2 (%)	Add
Population	Env	Chrom	Pos	Left Marker	Right Marker	LOD	R2 (%)	Add
LMPG-6/Romany	SA12	1	36.64	1A_39856840	1A_235277072	3.22	2.2009	0.0867
LMPG-6/Romany	SA12	4	17.3	2A_11044893	2A_152187592	3.061	1.3072	-0.0362
LMPG-6/Romany	SA12	4	20.3	2A_85264302	2A_96999682	13.9585	6.5365	-0.1579
LMPG-6/Romany	SA12	5	54.58	2B_14347146	2B_326925659	3.5749	2.2135	0.0726
LMPG-6/Romany	SA12	6	38.24	2D_74795526	2D_66140231	3.2706	1.7851	0.0744
LMPG-6/Romany	SA12	7	109	3A_53469891	3A_2957844	3.844	2.1051	0.0726
LMPG-6/Romany	SA12	10	42.69	4A_199888152	4A_46015334	4.0368	2.2784	0.072
LMPG-6/Romany	SA12	10	59.69	4A_64998255	4A_189502695	2.9995	2.0771	0.0721
LMPG-6/Romany	SA12	13	14.46	5A_90038827	5A_100826047	3.6284	2.2758	0.071
LMPG-6/Romany	StP13	2	29.92	1B_132747179	1B_228312889	4.8593	1.1598	-0.1385
LMPG-6/Romany	StP13	3	41.43	1D_75119490	1D_88926392	6.3813	1.1644	0.1394
LMPG-6/Romany	StP13	5	45.58	2B_14347146	2B_326925659	3.4946	0.9666	-0.1419
LMPG-6/Romany	StP13	5	133.58	2B_196211926	2B_271437326	5.1341	1.0845	-0.1384
LMPG-6/Romany	StP13	11	51.46	4B_299160842	4B_210047150	3.5717	1.0555	0.1416
LMPG-6/Romany	Ken13	18	31.94	6D_33045903	6D_117031823	4.1072	9.5841	-0.1075

## Sheet: JICIM
	Env	QTL	Left SNP	Right SNP	Pos (cM)	LOD	R2 (%)	Ada	Fahari	Gem	Kudu	Kulungu	Ngiri	Paka	Pasa	Popo	Romany	Left CI	Right CI	Highlighted columns show the additive values for each parent.
	SA12
Chromosome	1A	QSr.umn-1A.2	1A_53256976	1A_214244842	33	10.2596	3.051	0.0017	0.0189	0.0013	0.2282	0.004	0.0053	-0.0133	-0.0098	-0.0123	-0.0058	32.5	33.5
	2B	QSr.umn-2B.2	2B_295548243	2B_4526688	53	18.2718	1.516	-0.0066	0.007	0.0187	-0.0165	0.1787	0.0327	-0.0232	0.0014	-0.0115	-0.0059	50.5	53.5
	2B	QSr.umn-2B.4	2B_213779962	2B_217762722	120	7.9128	1.673	-0.0225	-0.0022	0.0012	0.0059	0.0137	0.1959	0.0121	-0.0284	0.0365	0.0325	118.5	121.5
	2B	QSr.umn-2B.6	2B_240297071	2B_8030264	157	6.7228	1.565	0.0038	-0.0041	0.01	-0.035	0.0072	0.1959	-0.006	0.0062	-0.0076	0.016	156.5	157.5
	2B	QSr.umn-2B.7	2B_5947980	2B_7857851	166	6.1777	1.566	0.0021	0.01	0.0409	0.0029	-0.0001	0.1936	-0.0141	0.0281	0.0092	-0.0139	165.5	166.5
	3A	QSr.umn-3A.3	3A_129756849	3A_56314630	88	6.6604	1.689	-0.0226	-0.0053	0.0023	0.0283	-0.0103	0.1996	-0.0094	0.0106	-0.0127	-0.0251	86.5	89.5
	3B	QSr.umn-3B.5	3B_538190692	3B_554937272	121	13.3969	4.432	0.0083	-0.0003	0.0027	-0.0013	0.0087	0.1887	0.053	0.0035	0.2185	-0.0003	120.5	121.5
	6B	QSr.umn-6B.3	6B_9311907	6B_32716113	18	19.1216	3.587	0.0031	0.0065	-0.0187	-0.0388	0.0247	-0.0111	0.0585	0.0183	0.2185	0.012	17.5	18.5
	StP12
Chromosome	1A	QSr.umn-1A.3	1A_168260073	1A_50914673	36	5.8611	4.22	0.012	0.0638	0.0201	-0.046	-0.0227	-0.0109	-0.0102	-0.0369	0.0791	0.0125	35.5	36.5
	1B	QSr.umn-1B.1	1B_147208366	1B_53696610	21	4.9744	9.24	-0.0292	-0.0449	-0.0385	-0.0938	-0.0275	0.0294	-0.063	-0.0199	0.0263	-0.1398	18.5	22.5
	1D	QSr.umn-1D.1	1D_132884204	1D_73589613	4	4.6381	11.052	0.0081	-0.0498	-0.0595	0.0419	0.0511	-0.0204	-0.1101	-0.1242	-0.0241	-0.0848	3.5	4.5
	2A	QSr.umn-2A.1	2A_13651965	2A_195408664	16	4.492	8.782	-0.0158	0.0413	0.0087	-0.1089	-0.0987	-0.09	-0.0447	0.0173	-0.0294	0.0668	15.5	16.5
	2A	QSr.umn-2A.4	2A_79498359	2A_242182740	104	4.4818	6.047	0.0063	0.0383	-0.0726	0.0707	-0.0261	-0.0432	0.0396	0.0695	-0.0242	-0.0286	103.5	106.5
	2A	QSr.umn-2A.5	2A_254280385	2A_226128547	144	5.3127	2.4	0.0744	0.0285	0.0425	-0.0006	-0.0067	-0.0332	0.0391	-0.0057	-0.0046	0.0155	141.5	145
	2B	QSr.umn-2B.3	2B_309579404	2B_313124463	60	4.68	6.911	-0.0152	0.0284	-0.0202	-0.011	-0.0362	-0.0588	0.0084	-0.0495	0.1015	-0.0756	59.5	60.5
	2B	QSr.umn-2B.8	2B_101605167	2B_106223007	177	4.5468	7.957	-0.015	-0.0068	-0.0186	-0.1212	-0.0086	-0.1357	0.0044	-0.0868	0.0243	-0.0038	174.5	179.5
	3A	QSr.umn-3A.2	3A_1387007	3A_593659	84	4.8466	3.669	0.0903	-0.046	0.0119	-0.0246	0.043	-0.0453	-0.0092	-0.0082	0.026	0.0233	83.5	84.5
	3B	QSr.umn-3B.1	3B_78345638	3B_113052046	45	5.0364	5.994	0.0005	0.009	-0.0293	-0.0535	-0.1674	-0.0209	0.0198	-0.0236	-0.0048	-0.0266	44.5	46.5
	3B	QSr.umn-3B.3	3B_474246441	3B_457961088	73	7.4241	3.651	-0.0104	0.002	-0.0483	-0.0707	-0.0463	-0.0651	-0.0019	0.0341	0.0247	-0.0392	71.5	73.5
	3B	QSr.umn-3B.4	3B_673326253	3B_82601403	108	4.8981	3.155	0.0168	-0.0327	-0.0342	0.0355	0.0009	-0.1067	-0.0006	-0.0313	-0.0004	0.0188	107.5	108.5
	3B	QSr.umn-3B.5	3B_538190692	3B_554937272	121	5.7461	6.241	0.0039	-0.0005	-0.043	-0.102	-0.0329	-0.0329	0.0347	0.0134	0.0708	0.0464	120.5	121.5
	4A	QSr.umn-4A.2	4A_206771574	4A_203748886	56	4.6672	15.64	0.1002	-0.01	-0.0336	0.0043	-0.1359	-0.0091	0.0229	-0.0029	-0.1762	-0.0635	54.5	57.5
	4B	QSr.umn-4B.1	4B_7771384	4B_249418276	7	4.6528	2.775	0.0079	0.0043	-0.0107	-0.0146	-0.0761	-0.0122	0.0047	-0.0317	0.0615	0.0193	2.5	15.5
	4D	QSr.umn-4D	4D_61244682	4D_58434790	21	4.6191	7.734	0.0731	-0.056	-0.0024	-0.0118	-0.0609	-0.1037	0.0557	-0.0382	0.0424	0.06	20.5	21.5
	5B	QSr.umn-5B	5B_258358007	5B_233185212	51	5.969	7.157	0.0596	0.0619	0.106	-0.0009	-0.0011	0.1266	0.0032	0.0207	0.0245	0.0716	50.5	51.5
	5D	QSr.umn-5D.1	5D_132702340	5D_42243468	0	7.1572	1.824	-0.0542	0.011	-0.0302	0.0055	-0.036	-0.0012	-0.0268	-0.0509	-0.0286	-0.0129	0	3.5
	5D	QSr.umn-5D.3	5D_101495576	5D_160703985	54	4.6274	5.702	0.0464	0.0828	-0.0335	-0.0321	-0.0074	0.0235	0.0492	-0.054	0.0257	-0.0477	49.5	55.5
	6A	QSr.umn-6A.2	6A_122645837	6A_179911250	34	4.4113	7.159	0.0355	0.003	-0.0307	-0.1398	-0.0048	-0.1182	-0.02	-0.0178	-0.0201	0.0077	32.5	35.5
	6B	QSr.umn-6B.2	6B_126754701	6B_84302066	14	6.9645	16.179	0.1371	-0.1092	0.0009	0.1478	-0.0345	0.1047	0.0098	-0.0077	0.0071	-0.0612	13.5	14.5
	6B	QSr.umn-6B.4	6B_93351986	6B_102497862	56	4.6411	7.081	0.0285	0.0305	-0.0497	-0.0721	-0.0432	-0.036	0.0166	-0.1097	0.0476	-0.0301	55.5	57.5
	7B	QSr.umn-7B	7B_31491181	7B_165679070	18	5.2798	8.787	-0.0668	-0.0602	0.0157	-0.0926	-0.1623	-0.0101	-0.0279	-0.0509	0.0112	0.0272	17.5	19.5
	StP13
Chromosome	1A	QSr.umn-1A.1	1A_206952839	1A_23096423	20	4.7269	12.413	-0.1376	-0.0628	-0.0003	-0.1559	-0.0203	-0.1919	0.0146	0.0067	0.0407	0.0035	19.5	20.5
	1B	QSr.umn-1B.2	1B_53696610	1B_132392073	23	5.9069	13.452	-0.0219	-0.1615	-0.0375	-0.056	0.0112	-0.0128	-0.0003	-0.158	0.0948	0.0201	22.5	23.5
	2A	QSr.umn-2A.4	2A_79498359	2A_242182740	103	4.8596	9.588	-0.0557	0.0589	0.0128	0.0945	-0.0313	-0.2185	0.0257	0.0282	-0.006	-0.0151	102.5	104.5
	2B	QSr.umn-2B.1	2B_280703004	2B_295548243	38	4.7368	2.047	-0.0542	-0.0643	-0.033	0.0193	-0.0106	0.0066	0.025	-0.0341	-0.0031	-0.0292	32.5	45.5
	2B	QSr.umn-2B.3	2B_309579404	2B_313124463	60	6.6165	6.726	-0.0281	0.1062	-0.024	-0.0133	-0.0284	-0.0388	-0.0352	-0.1084	0.0454	-0.0438	59.5	60.5
	2B	QSr.umn-2B.5	2B_309861110	2B_310443339	128	6.054	4.569	-0.0312	-0.0443	-0.0199	0.0075	0.0342	0.0294	-0.0567	-0.0507	-0.1099	-0.0537	126.5	129.5
	2B	QSr.umn-2B.8	2B_101605167	2B_106223007	177	7.4772	9.012	-0.0495	0.0138	-0.0062	-0.0542	0.0086	-0.2213	-0.0005	-0.1112	0.0202	-0.0069	174.5	178.5
	3A	QSr.umn-3A.4	3A_56314630	3A_13438571	94	4.7753	8.682	-0.0428	-0.0628	0.0379	0.0516	0.0257	-0.21	0.0262	0.0113	0.0328	-0.0514	88.5	99.5
	3B	QSr.umn-3B.1	3B_78345638	3B_113052046	45	4.8312	1.841	0.0168	0.0108	-0.0476	-0.0312	-0.0363	-0.0042	0.0483	-0.0253	0.0202	-0.0151	43.5	46.5
	3B	QSr.umn-3B.3	3B_474246441	3B_457961088	73	5.6311	2.085	-0.0042	0.0028	-0.0413	-0.0499	-0.0254	-0.0465	0.0022	0.0028	0.0434	-0.0484	71.5	74.5
	3B	QSr.umn-3B.4	3B_673326253	3B_82601403	108	6.8866	4.995	0.006	-0.0631	-0.0404	0.0149	0.0005	-0.1711	-0.0006	-0.0285	0	0.0293	107.5	108.5
	3B	QSr.umn-3B.6	3B_653796159	3B_69194200	153	4.7177	7.637	-0.0447	-0.0632	-0.0958	-0.1034	-0.0108	0.1385	-0.0494	-0.0525	-0.0203	-0.0229	152.5	153.5
	3D	QSr.umn-3D.2	3D_82418566	3D_7822000	26	7.2814	11.891	0.1775	0.0234	-0.001	-0.0993	-0.0533	-0.1745	0.0119	-0.017	0.0143	0.0204	24.5	26.5
	4A	QSr.umn-4A.3	4A_61845029	4A_85884	60	4.7952	12.165	-0.0042	-0.1625	-0.0696	0.0386	0.0436	-0.1971	0	-0.0108	-0.0133	0.0467	59.5	61.5
	4B	QSr.umn-4B.2	4B_249418270	4B_299468755	12	5.4312	1.966	0.0395	0.0033	0.0358	-0.0252	-0.0283	-0.0284	0.0001	-0.0073	0.0587	0.0392	6.5	15.5
	4B	QSr.umn-4B.3	4B_282191767	4B_203809435	51	5.892	8.274	-0.0022	0.1343	-0.081	-0.0387	0.0223	0.1299	0.0095	-0.0106	-0.0165	-0.0311	50.5	51.5
	5A	QSr.umn-5A.1	5A_46839174	5A_73073115	34	5.4768	7.38	0.0093	-0.0247	0.0168	0.0602	0.0698	-0.1895	-0.0354	-0.0586	-0.0148	0.0295	33.5	34.5
	5A	QSr.umn-5A.2	5A_141915167	5A_36971691	92	4.6356	5.752	0.0189	0.0204	0.0137	-0.0202	0.0125	0.1698	-0.0611	-0.0461	-0.0016	0.0428	91.5	92.5
	5B	QSr.umn-5B	5B_258358007	5B_233185212	51	7.6926	8.419	0.1434	0.0678	0.1027	-0.0015	-0.0018	0.1633	0.0043	0.0238	0.019	0.0507	50.5	51.5
	5D	QSr.umn-5D.1	5D_132702340	5D_42243468	4	8.2575	2.57	-0.023	0.0343	-0.053	-0.0237	-0.0567	-0.0067	-0.0127	-0.0729	-0.0366	0.0082	0	8.5
	6A	QSr.umn-6A.1	6A_12874936	6A_16883183	21	4.871	4.33	0.0384	0.0083	-0.0435	0.0222	0.0378	0.0235	-0.0403	0.1161	0.0025	0.0153	20.5	21.5
	6B	QSr.umn-6B.1	6B_151312142	6B_170431538	9	6.261	3.453	0.0242	0.075	0.0085	-0.0546	-0.0635	0.0301	0.0103	-0.0592	0.0119	-0.0059	6.5	11.5
	6B	QSr.umn-6B.4	6B_93351986	6B_102497862	56	5.6436	9.507	-0.0303	0.0527	-0.0533	0.0226	-0.0317	-0.211	0.036	-0.091	0.0398	-0.0177	55.5	57.5
	7A	QSr.umn-7A	7A_5990339	7A_2150377	3	5.9646	3.149	0.0527	0.0535	0.0368	0.0472	-0.0232	0.0675	-0.0441	-0.0152	-0.0234	-0.017	2.5	3.5
	7B	QSr.umn-7B	7B_31491181	7B_165679070	18	7.3979	7.676	-0.0665	-0.154	-0.0155	-0.0588	-0.0544	-0.0053	-0.1124	-0.0432	-0.0159	-0.0078	17.5	18.5
	7D	QSr.umn-7D.1	7D_169623267	7D_6018236	25	5.5414	7.233	0.0367	0.0013	-0.0024	-0.0434	-0.0118	0.1286	-0.053	-0.0539	0.014	-0.1161	24.5	25.5
	Ken13
Chromosome	1B	QSr.umn-1B.2	1B_53696610	1B_132392073	23	5.1186	14.839	-0.0136	-0.0878	0.0175	-0.0892	-0.0301	-0.0673	-0.0001	-0.1032	-0.1978	0.0878	22.5	23.5
	1D	QSr.umn-1D.2	1D_95968008	1D_62309262	23	5.0112	8.164	0.0015	-0.0133	0.0098	0.0494	-0.1674	-0.1327	0.0771	-0.0025	0.0045	0.0324	22.5	23.5
	1D	QSr.umn-1D.3	1D_35680303	1D_88397452	61	5.041	1.459	-0.0047	0.0155	0.0121	-0.0188	-0.0424	0.0168	0.0189	0.0587	0.024	0.0335	57.5	64.5
	2A	QSr.umn-2A.2	2A_118236938	2A_152187592	17	6.6788	10.631	0.0514	-0.022	-0.0191	0.0009	-0.2557	-0.0565	-0.0867	-0.003	-0.0057	-0.0244	16.5	17.5
	2A	QSr.umn-2A.3	2A_51324996	2A_85808005	72	5.8274	20.353	0.0806	-0.0274	0.0183	-0.1652	-0.3181	0.0033	0.057	0.0052	-0.0155	-0.022	71.5	72.5
	2B	QSr.umn-2B.2	2B_295548243	2B_4526688	51	7.4771	6.514	-0.022	-0.0139	-0.0269	0.0043	-0.1822	-0.0393	0.027	0.0075	-0.0837	-0.0592	48.5	54.5
	2D	QSr.umn-2D	2D_33325361	2D_67210583	66	5.2356	15.504	-0.0005	0.0039	-0.0264	0.0001	-0.3147	0.041	-0.0652	-0.0758	0.0313	-0.0586	65.5	66.5
	3A	QSr.umn-3A.1	3A_181341646	3A_179465173	25	5.4951	7.8	0.0683	0.0037	-0.0176	-0.0551	-0.0404	0.1549	-0.0947	-0.0588	-0.0148	0.0401	20.5	28.5
	3B	QSr.umn-3B.2	3B_307596471	3B_472788308	47	6.8116	14.809	-0.015	-0.0202	-0.0343	-0.0897	-0.3176	0.003	0.0168	-0.0051	0.0219	-0.0431	44.5	48.5
	3B	QSr.umn-3B.7	3B_637775720	3B_685400555	171	5.2091	16.394	-0.0327	-0.0124	-0.0376	-0.1887	-0.2121	0.1082	-0.0687	-0.1072	0.0497	-0.0156	169.5	172.5
	3D	QSr.umn-3D.1	3D_22552516	3D_108958384	14	5.613	11.181	0.041	0.0133	0.01	-0.0402	-0.221	0.1548	-0.0251	-0.0503	0.0206	0.03	12.5	16.5
	4A	QSr.umn-4A.1	4A_102326764	4A_9938386	10	5.5216	12.815	-0.0034	0.0162	-0.0466	-0.0195	0.297	-0.0126	0.0063	-0.0133	0.0394	-0.0064	6.5	10.5
	5A	QSr.umn-5A.2	5A_141915167	5A_36971691	92	5.7939	3.807	0.0674	0.0064	0.0183	-0.018	0.0465	0.0777	0.0419	-0.0441	0.0436	0.0771	91.5	92.5
	5D	QSr.umn-5D.1	5D_132702340	5D_42243468	4	5.0975	1.411	-0.0326	0.0057	-0.057	-0.0305	-0.0301	-0.0028	0	-0.0363	-0.0393	0.0076	0	9.5
	5D	QSr.umn-5D.2	5D_145713577	5D_101495576	47	6.2821	13.202	-0.021	0.0097	-0.0294	0.0343	-0.2234	0.0023	0.1198	-0.1053	-0.0394	-0.0074	46.5	47.5
	6A	QSr.umn-6A.3	6A_206123355	6A_83918914	47	7.5113	3.61	0.0897	-0.013	0.0117	0.0246	-0.0596	0.0162	0.0011	0.0747	-0.001	-0.0434	46.5	47.5
	6B	QSr.umn-6B.2	6B_126754701	6B_84302066	14	7.5795	11.825	0.1888	0.0727	0.0626	0.155	0.0101	0.0545	-0.013	-0.0484	0.0336	-0.0254	13.5	14.5
	6B	QSr.umn-6B.4	6B_93351986	6B_102497862	56	4.8864	6.638	0.0907	0.0535	-0.0721	-0.1075	-0.0615	0.0204	0.032	-0.0124	0.0406	-0.0268	55.5	57.5
	7B	QSr.umn-7B	7B_31491181	7B_165679070	18	5.0572	15.681	-0.0191	0.0208	0.0062	-0.0855	-0.3109	-0.0396	0.0439	-0.005	-0.0209	-0.0813	17.5	19.5
	7D	QSr.umn-7D.2	7D_185746125	7D_189775657	26	6.043	3.706	0.0049	-0.0064	-0.0122	-0.0738	-0.0032	-0.0986	0.0502	-0.0406	0.0207	0.0421	25.5	27

## Sheet: Marker Screening
Line\Gene	Sr2	Sr22	Sr24	Sr25	Sr26	Sr28	Sr31	Sr32	Sr33	Sr35	Sr36	Sr39	Sr40	Sr42	SrCad	SrWeb
Ada	-	-	-	-	-	-	-	-	-	-	-	-	-	-	-	-
Fahari	-	-	-	-	-	-	-	-	-	-	-	-	-	-	-	-
Gem	+	+	-	-	-	-	-	-	-	-	-	-	-	-	-	-
Kudu	+	-	-	-	-	-	-	-	-	+	-	-	-	-	-	-
Kulungu	-	-	-	-	-	-	-	-	-	-	-	-	-	+	-	-
Ngiri	-	-	-	-	-	-	-	-	-	-	-	-	-	+	-	-
Paka	+	-	-	-	-	-	-	-	-	-	-	-	-	-	-	-
Pasa	-	-	-	-	-	-	-	-	-	-	-	-	-	+	-	-
Popo	-	-	-	-	-	-	-	-	-	-	-	-	-	+	-	-
Romany	-	-	-	-	-	-	-	-	-	-	-	-	-	-	-	-
Putative genes present in the NAM parents based on marker screening.
Marker screening was conducted using diagnostic markers for genes resistant to Ug99 races, as catalogued in (MAS Wheat 2014 http://maswheat.ucdavis.edu/)

## Sheet: Sr Severity
	StP12							StP13					SA12		Ken13
Line	HD	SrSev	SrIR	Sr	Awn	Height		HD	SrSev	SrIR	Sr		Sr		GS	SrSev	SrIR	Sr
ada_1	4	55	S	55	Yes	63.7		8	90	s	90		3		5	20	MSS	18
ada_2	18	40	S	40	Yes	68		22	45	mss	40.5		4		3	5	MSS	4.5
ada_3	19	20	MSS	18	Yes	66.7		27	20	mss	18		4		2	5	MSS	4.5
ada_5	11	25	MSS	22.5	Yes	81.7		14	50	s	50		2		4	30	S	30
ada_6	1	65	S	65	Yes	76.3		6	60	s	60		3		5	50	MSS	45
ada_7	15	30	MSS	27	No	83.3		20	25	mss	22.5		1		5	15	MS	12
ada_8	1	55	MR	22	Yes	81		6	65	s	65		2		6	45	S	45
ada_9	8	45	MRMSS	31.5	Yes	89		10	55	s	55		6		6	15	M	9
ada_11	5	15	MR	6	No	65.7		10	30	mrms	18		3		5	15	M	9
ada_12	21	15	MSS	13.5	Yes	78		24	25	mrms	15		6		1	1	R	0.2
ada_13	18	30	MSS	27	Yes	56.7		20	35	mss	31.5		2		3	30	S	30
ada_14	1	60	S	60	Yes	69.7		4	50	mss	45		4		5	40	MSS	36
ada_15	18	60	S	60	Yes	81.3		21	45	mrms	27		2		5	30	M	18
ada_17	15	40	MSS	36	Yes	68.7		22	15	mrms	9		2		3	10	MSS	9
ada_18	9	35	MSS	31.5	No	60.7		12	40	mss	36		2		5	1	R	0.2
ada_19	18	45	MSS	40.5	Yes	75.3		22	45	mss	40.5		4		3	30	MSS	27
ada_21	1	55	S	55	No	81		6	75	s	75		2		5	30	S	30
ada_22	4	40	MSS	36	No	84.3		7	65	s	65		8		4	10	MS	8
ada_23	8	45	MSS	40.5	No	94.7		10	55	mss	49.5		3		6	15	M	9
ada_24	6	55	S	55	No	104		11	55	mss	49.5		5		6	15	M	9
ada_26	11	55	S	55	Yes	75		13	50	s	50		9		5	20	MSS	18
ada_27	17	25	MSS	22.5	Yes	75		22	15	mrms	9		3		3	15	MSS	13.5
ada_28	6	45	S	45	Yes	72.3		10	45	mrms	27		6		6	20	S	20
ada_29	8	50	S	50	Yes	75.7		12	55	mss	49.5		9		5	55	S	55
ada_30	6	15	RMR	4.5	Yes	79		11	15	mrr	7.5		3		5	40	MSS	36
ada_31	3	50	S	50	No	71.7		7	50	mrms	30		9		6	55	S	55
ada_32	12	60	S	60	No	75.7		13	40	mss	36		4		5	10	M	6
ada_33	8	60	S	60	No	78.7		10	50	mss	45		5		5	20	M	12
ada_34	9	35	S	35	No	73.7		13	35	mss	31.5		8		5	20	MSS	18
ada_35	9	60	S	60	No	76.3		13	55	s	55		3		5	40	S	40
ada_37	5	45	MSS	40.5	No	80		6	50	mss	45		2		6	30	S	30
ada_38	18	35	S	35	No	80.7		13	10	mss	9		2		2	20	MSS	18
ada_41	3	50	S	50	Yes	77		7	50	mss	45		3		5	40	MSS	36
ada_42	6	65	S	65	Yes	79.3		10	45	mss	40.5		2		5	20	M	12
ada_43	6	60	S	60	No	83.7		12	35	mrms	21		3		5	30	M	18
ada_44	13	20	MSS	18	No	74.3		20	10	mss	9		1		3	20	M	12
ada_45	9	25	MS	20	Yes	70.3		12	25	mrms	15		1		4	30	MSS	27
ada_46	21	20	MSS	18	No	76.7		26	10	mr	4		5		2	20	S	20
ada_47	1	55	S	55	No	86		8	35	mrms	21		3		6	40	S	40
ada_48	6	65	S	65	No	83.3		8	55	mss	49.5		2		4	40	MSS	36
ada_49	6	45	S	45	Yes	75.3		9	55	mss	49.5		5		6	15	M	9
ada_50	2	60	S	60	No	87.3		7	50	mss	45		6		5	30	MSS	27
ada_51	9	45	S	45	No	48.3		8	40	s	40		6		5	30	MSS	27
ada_52	5	45	MSS	40.5	No	82.3		9	40	s	40		6		6	15	M	9
ada_54	8	20	M	12	Yes	82.3		11	20	mrms	12		6		5	10	M	6
ada_56	6	60	S	60	Yes	81.3		12	30	mrms	18		7		6	15	M	9
ada_57	10	45	MSS	40.5	No	79.7		12	25	mrms	15		9		4	30	MSS	27
ada_58	19	25	S	25	No	65		22	20	mss	18		3		3	10	MSS	9
ada_59	7	20	M	12	Yes	73		11	25	mrms	15		6		5	25	MSS	22.5
ada_61	7	65	S	65	Yes	85		12	30	mrms	18		7		6	20	MSS	18
ada_62	6	25	MSS	22.5	Yes	58.7		12	40	s	40		4		5	30	MR	12
ada_63	10	40	MSS	36	Yes	75.3		13	25	mr	10		3		5	40	MSS	36
ada_64	8	30	MSS	27	No	56		12	30	mss	27		4		5	20	S	20
ada_65	6	65	S	65	Yes	82.3		7	50	mss	45		2		5	40	MSS	36
ada_66	2	50	MSS	45	Yes	88.7		4	60	mss	54		2		6	45	S	45
ada_67	10	60	S	60	Yes	58.3		29	25	s	25		2		3	30	S	30
ada_68	8	45	MSS	40.5	Yes	70		13	45	mss	40.5		2		5	40	M	24
ada_69	9	50	S	50	No	83.3		12	45	mss	40.5		2		5	15	M	9
ada_70	17	50	S	50	No	85.7		10	35	mrms	21		9		4	25	S	25
ada_71	15	45	S	45	Yes	90		23	20	s	20		8		2	15	MSS	13.5
ada_72	11	35	MSS	31.5	Yes	83.3		14	40	mss	36		7		5	15	M	9
ada_73	3	60	S	60	No	69		5	50	s	50		8		6	45	S	45
ada_74	16	40	MSS	36	No	90.3		20	20	mrms	12		6		4	10	MSS	9
ada_75	7	70	S	70	No	69.7		11	55	mss	49.5		8		5	40	MSS	36
ada_76	19	40	MSS	36	Yes	74		22	25	mss	22.5		8		3	20	S	20
ada_77	18	40	S	40	No	76		22	25	mss	22.5		7		3	20	MSS	18
ada_78	4	45	S	45	Yes	80.7		6	30	mrms	18		6		5	35	M	21
ada_79	10	45	M	27	No	81.7		10	30	mrms	18		5		6	40	MSS	36
ada_81	4	20	RMR	6	Yes	80.7		6	25	mr	10		8		6	15	M	9
ada_82	15	40	MSS	36	Yes	80		19	40	s	40		7		3	30	MSS	27
ada_84	11	45	S	45	Yes	68.3		14	25	rmr	7.5		8		5	20	MSS	18
fahari_1	17	30	MSS	27	No	74.7		20	10	mss	9		8		3	1	R	0.2
fahari_2	3	20	RMR	6	Yes	83.7		6	15	rmr	4.5		3		5	1	R	0.2
fahari_3	4	30	MSS	27	Yes	74.3		7	25	mss	22.5		6		5	5	RMR	1.5
fahari_4	6	35	MSS	31.5	Yes	88.7		6	25	mrms	15		5		5	10	M	6
fahari_5	4	35	M	21	No	73		6	20	mrms	12		4		6	10	MSS	9
fahari_6	12	35	M	21	Yes	83		10	40	mrms	24		3		5	10	M	6
fahari_7	4	20	MR	8	No	83		4	25	mrms	15		2		6	1	R	0.2
fahari_8	21	10	MSS	9	No	78.7		30	10	rmr	3		2		3	1	R	0.2
fahari_9	18	20	MSS	18	Yes	79.7		15	10	rmr	3		6		3	5	MSS	4.5
fahari_10	10	30	M	18	No	77.7		14	10	rmr	3		7		5	5	MS	4
fahari_12	4	30	RMRMS	18	Yes	71.3		3	45	mrms	27		4		6	10	M	6
fahari_13	4	40	MSS	36	Yes	76.7		3	30	mrms	18		4		6	1	S	1
fahari_14	8	40	M	24	Yes	84.7		14	20	mrms	12		6		4	5	MS	4
fahari_16	5	55	S	55	No	78		5	80	s	80		4		6	5	M	3
fahari_18	3	20	RMR	6	No	71.7		22	10	r	2		5		4	1	S	1
fahari_19	8	20	RMR	6	No	69		6	25	rmr	7.5		5		6	1	R	0.2
fahari_22	14	15	RMR	4.5	No	85.7		21	10	rmr	3		7		3	1	S	1
fahari_23	8	30	RMRMS	18	No	80		12	25	mrms	15		6		4	5	M	3
fahari_25	3	30	MS	24	Yes	72		6	35	mrms	21		2		6	5	M	3
fahari_26	5	20	RMR	6	Yes	74.3		8	20	rmr	6		4		6	1	R	0.2
fahari_27	21	20	MSS	18	Yes	85.7		30	5	rmr	1.5		4		1	5	MS	4
fahari_28	4	30	M	18	Yes	75		6	30	mrms	18		4		6	5	M	3
fahari_29	9	25	RMR	7.5	Yes	76.7		11	25	rmr	7.5		4		5	25	M	15
fahari_30	3	40	MS	32	No	74.3		6	65	s	65		5		6	5	RMR	1.5
fahari_31	3	20	MR	8	A/N	88		4	25	rmr	7.5		3		6	20	M	12
fahari_32	3	30	M	18	Yes	83.7		7	30	mrms	18		5		6	5	R	1
fahari_33	3	20	MSS	18	Yes	74.7		3	30	mrms	18		3		6	1	R	0.2
fahari_34	6	30	MS	24	Yes	73.3		5	30	mrms	18		4		6	20	MSS	18
fahari_35	6	25	MS	20	Yes	70		4	45	mrms	27		4		6	5	RMR	1.5
fahari_36	10	40	MSS	36	Yes	74.7		8	35	mss	31.5		5		5	10	MSS	9
fahari_37	5	30	M	18	Yes	79		6	40	mss	36		3		5	1	MS	0.8
fahari_38	6	20	M	12	No	78.7		9	30	mrms	18		6		5	10	MS	8
fahari_40	3	20	RMR	6	No	81.3		4	20	rmr	6		4		6	20	MR	8
fahari_41	5	25	M	15	No	88.3		7	25	rmr	7.5		6		4	5	M	3
fahari_42	6	20	RMR	6	No	77.7		11	25	mrr	12.5		4		5	10	MSS	9
fahari_43	15	30	MSS	27	Yes	82.3		26	5	mrms	3		5		3	1	S	1
fahari_44	3	35	MS	28	No	73.7		4	30	mrms	18		6		5	15	MSS	13.5
fahari_45	2	15	RMR	4.5	Yes	80		6	15	r	3		5		5	5	M	3
fahari_46	2	40	MSS	36	No	85.7		5	30	mss	27		8		6	5	MSS	4.5
fahari_47	8	35	MSS	31.5	Yes	86.3		12	20	mrms	12		3		4	5	MSS	4.5
fahari_48	2	45	S	45	Yes	82.7		4	55	s	55		4		6	20	M	12
fahari_49	18	20	MSS	18	No	68.7		26	10	s	10		4		3	5	MS	4
fahari_50	3	30	M	18	Yes	80.7		5	40	mrms	24		6		4	10	M	6
fahari_51	19	15	M	9	No	78.7		25	5	s	5		6		3	5	MS	4
fahari_52	3	35	MSS	31.5	No	82.7		10	35	mss	31.5		3		6	10	MSS	9
fahari_53	3	45	S	45	No	85		5	60	mss	54		4		6	15	M	9
fahari_54	6	20	RMR	6	Yes	90.3		8	45	mrms	27		3		5	10	MSS	9
fahari_55	6	20	RMR	6	Yes	70		11	20	rmr	6		5		5	5	M	3
fahari_57	9	25	M	15	No	73.3		12	15	rmr	4.5		8		5	5	M	3
fahari_58	7	30	MS	24	Yes	78.7		10	30	mss	27		5		5	1	R	0.2
fahari_59	14	35	MSS	31.5	No	84		10	25	mrms	15		4		6	1	R	0.2
fahari_60	3	35	MS	28	Yes	79.7		2	40	mrms	24		5		5	10	M	6
fahari_61	3	40	M	24	Yes	81		7	35	mss	31.5		9		3	15	MSS	13.5
fahari_62	17	30	MSS	27	Yes	85		23	25	s	25		4		5	10	MSS	9
fahari_63	3	35	MSS	31.5	Yes	74.7		6	30	mss	27		4		6	10	M	6
fahari_64	3	30	RMRMS	18	Yes	80.7		5	20	mrms	12		5		6	10	M	6
fahari_65	9	20	RMR	6	Yes	80.7		14	15	mrms	9		4		6	10	M	6
fahari_66	5	35	MSS	31.5	Yes	89		7	25	mss	22.5		3		5	5	M	3
fahari_67	2	20	M	12	No	72		2	30	rmr	9		7		6	5	M	3
fahari_68	21	15	MSS	13.5	No	87		28	5	mr	2		1		2	1	S	1
fahari_69	6	50	MSS	45	No	77.7		10	30	mss	27		4		5	5	M	3
fahari_70	4	45	MSS	40.5	No	79		6	60	mss	54		9		6	20	MSS	18
fahari_71	5	50	S	50	No	84		6	45	mrms	27		4		6	25	M	15
fahari_72	3	35	M	21	Yes	85		2	45	mrms	27		6		6	5	M	3
fahari_73	6	25	RMR	7.5	Yes	91		6	25	mrms	15		5		5	15	M	9
fahari_76	23	30	MSS	27	Yes	90.3		14	20	mrms	12		5		3	0	R	0
fahari_77	6	20	RMR	6	Yes	83.7		10	15	rmr	4.5		9		6	5	RMR	1.5
fahari_78	3	35	MS	28	No	77.3		6	40	mrms	24		4		6	1	R	0.2
fahari_79	8	45	MSS	40.5	Yes	89.7		11	40	mrms	24		4		5	15	MS	12
fahari_80	4	40	MSS	36	Yes	77.3		6	30	mrms	18		5		6	10	M	6
fahari_81	16	35	MSS	31.5	Yes	74.7		30	10	s	10		5		4	5	MSS	4.5
fahari_83	4	35	MSS	31.5	Yes	75		7	55	s	55		5		6	10	MSS	9
fahari_85	4	30	M	18	Yes	81.7		6	40	mrms	24		NA		5	10	M	6
fahari_86	3	35	MS	28	Yes	79		6	30	mrms	18		3		5	10	RMR	3
fahari_87	3	25	RMR	7.5	Yes	81.7		6	25	rmr	7.5		4		5	20	M	12
fahari_88	13	40	MS	32	Yes	77.7		21	20	mss	18		2		3	5	MSS	4.5
fahari_89	8	50	S	50	Yes	79.3		12	50	s	50		4		5	15	M	9
fahari_90	3	20	RMR	6	No	73.7		6	45	s	45		4		6	5	M	3
fahari_91	2	35	MSS	31.5	No	75		5	50	s	50		NA		6	5	M	3
fahari_92	3	40	MS	32	No	83.3		6	55	s	55		4		5	20	M	12
fahari_93	2	45	S	45	Yes	77.3		4	60	mss	54		9		5	10	M	6
fahari_94	8	20	RMR	6	Yes	75.3		10	20	rmr	6		5		5	10	MSS	9
fahari_95	13	15	RMR	4.5	Yes	88.3		21	15	rmr	4.5		8		3	10	MSS	9
fahari_96	6	30	M	18	Yes	71		6	30	mrms	18		5		5	20	MSS	18
fahari_97	3	30	M	18	Yes	72.7		2	40	rmr	12		5		6	15	MS	12
fahari_98	22	25	MSS	22.5	No	84		16	10	mss	9		4		1	5	MSS	4.5
fahari_99	2	45	MSS	40.5	No	80.3		6	50	mss	45		5		5	40	S	40
fahari_100	12	35	MSS	31.5	Yes	74.7		21	20	mss	18		3		1	1	S	1
fahari_101	6	35	M	21	No	76.3		10	35	mrms	21		6		5	5	MS	4
fahari_102	7	25	M	15	No	83.3		8	30	mrms	18		7		5	1	S	1
gem_1	11	40	MSS	36	No	74		13	40	mrms	24		9		5	30	S	30
gem_2	13	45	S	45	No	84		19	15	mrms	9		5		2	5	MS	4
gem_3	2	60	S	60	No	84		3	75	s	75		6		6	40	MSS	36
gem_4	21	40	MSS	36	No	71		1	15	mrms	9		10		1	1	R	0.2
gem_6	19	35	MSS	31.5	No	76.7		1	30	mss	27		8		1	10	MSS	9
gem_7	9	40	S	40	No	86		13	45	s	45		7		3	10	MSS	9
gem_8	8	50	MSS	45	No	79.3		7	50	s	50		8		5	20	MSS	18
gem_9	9	20	RMR	6	No	73		11	25	mss	22.5		7		2	1	MS	0.8
gem_10	7	35	MSS	31.5	No	79.3		10	45	mss	40.5		6		5	10	MSS	9
gem_11	5	65	S	65	N	89.7		4	50	s	50		3		5	35	M	21
gem_12	14	55	S	55	No	79.7		18	35	mss	31.5		5		5	30	S	30
gem_13	21	20	MSS	18	No	66		11	30	mss	27		4		1	10	MSS	9
gem_14	13	45	MSS	40.5	No	77		22	25	mss	22.5		8		2	10	MS	8
gem_15	5	40	M	24	No	84.7		3	60	s	60		5		6	15	MSS	13.5
gem_16	9	40	MSS	36	No	80.7		12	45	s	45		8		5	20	MSS	18
gem_17	9	25	M	15	No	74.7		10	25	mrms	15		8		6	1	R	0.2
gem_18	3	45	S	45	No	76.7		5	55	s	55		6		6	35	MSS	31.5
gem_19	13	40	MS	32	No	81		13	40	s	40		5		4	10	M	6
gem_20	9	40	MSS	36	No	80.3		12	40	s	40		5		4	10	M	6
gem_21	12	40	MSS	36	No	69.7		12	30	mrms	18		5		5	1	S	1
gem_22	8	35	M	21	No	77		12	50	s	50		9		5	25	MSS	22.5
gem_23	4	15	RMR	4.5	No	87.7		10	50	s	50		5		3	5	MS	4
gem_24	6	20	RMR	6	No	80.7		9	35	mrms	21		NA		4	5	MSS	4.5
gem_25	9	45	MS	36	No	73.3		10	45	s	45		5		5	30	S	30
gem_26	2	25	M	15	No	79		6	40	mrms	24		4		5	20	M	12
gem_27	9	40	MSS	36	No	83.3		13	40	mrms	24		3		3	10	MSS	9
gem_28	12	40	MSS	36	No	71.3		23	40	mrms	24		7		1	10	M	6
gem_29	8	40	MRMSS	28	No	75.3		11	35	mrms	21		5		4	5	M	3
gem_30	11	50	S	50	No	70.3		13	45	mss	40.5		3		2	20	MSS	18
gem_31	8	25	M	15	No	73		8	40	mrms	24		6		4	30	MSS	27
gem_32	2	50	S	50	No	72.7		2	50	s	50		NA		5	35	S	35
gem_33	5	65	S	65	No	80		6	45	ms	36		6		3	5	MSS	4.5
gem_34	18	20	MSS	18	No	74.3		24	10	mss	9		9		3	1	R	0.2
gem_35	5	45	S	45	No	73.7		4	45	mrms	27		5		4	5	MSS	4.5
gem_36	10	55	S	55	No	76.7		12	60	s	60		5		3	30	MSS	27
gem_37	2	50	S	50	No	81		5	60	s	60		4		6	20	MSS	18
gem_39	13	50	S	50	No	71.7		15	40	mrms	24		4		2	10	MSS	9
gem_40	4	40	MSS	36	No	73.7		6	50	s	50		6		5	30	MSS	27
gem_41	18	25	M	15	No	77		26	10	rmr	3		7		1	0	R	0
gem_42	19	20	MS	16	No	72.3		19	20	mss	18		6		1	5	MSS	4.5
gem_43	5	30	MS	24	No	80.3		8	25	mrms	15		4		5	1	MS	0.8
gem_44	9	40	MSS	36	No	87.7		12	35	mrms	21		5		3	5	MS	4
gem_45	10	35	S	35	No	73.3		13	30	mss	27		7		1	10	MS	8
gem_46	9	35	S	35	No	83		10	25	mrms	15		5		5	1	RMR	0.3
gem_47	9	45	S	45	No	81.7		12	40	mss	36		4		5	10	MSS	9
gem_48	7	45	S	45	No	83		7	45	mss	40.5		4		5	25	MSS	22.5
gem_49	7	25	MS	20	No	80.7		7	35	mss	31.5		3		3	1	S	1
gem_50	10	40	S	40	No	69		12	30	mss	27		6		5	10	MSS	9
gem_51	3	30	MRMSS	21	No	76.7		5	50	mrms	30		10		5	10	M	6
gem_52	8	20	RMR	6	No	72.3		10	20	mrms	12		5		3	5	M	3
gem_53	8	50	S	50	No	75.7		10	50	mrms	30		6		4	10	M	6
gem_54	10	45	MSS	40.5	No	73.7		12	40	mrms	24		5		4	30	MSS	27
gem_55	4	45	MSS	40.5	No	81		10	45	mrms	27		NA		5	15	M	9
gem_56	12	45	MSS	40.5	No	87		17	30	mss	27		6		3	15	M	9
gem_57	21	15	MSS	13.5	No	70.7		29	10	mrms	6		5		5	5	M	3
gem_58	10	30	M	18	No	76		10	35	mss	31.5		6		3	1	R	0.2
gem_59	16	20	M	12	No	77.3		24	10	mss	9		5		1	1	R	0.2
gem_60	15	35	S	35	No	78.3		20	25	mss	22.5		8		3	10	MSS	9
gem_62	10	40	S	40	No	61.3		11	40	mrms	24		8		4	10	MSS	9
gem_63	1	25	M	15	No	80.3		4	45	mrms	27		6		5	5	M	3
gem_65	2	45	S	45	No	72.3		2	45	mrms	27		5		5	15	MS	12
gem_66	15	45	S	45	No	69.3		22	25	s	25		5		3	5	MS	4
gem_67	4	20	RMR	6	No	83.7		6	25	rmr	7.5		5		5	15	M	9
gem_68	3	45	S	45	No	78		6	40	mrms	24		4		5	30	MSS	27
gem_69	6	40	MS	32	No	61.7		10	30	mrms	18		7		4	20	MSS	18
gem_70	3	50	MSS	45	No	74		6	40	mrms	24		NA		5	1	R	0.2
gem_71	5	55	S	55	No	71.5		9	45	mrms	27		4		3	20	M	12
gem_72	8	55	MSS	49.5	No	64.7		10	45	mss	40.5		8		3	35	MSS	31.5
gem_73	8	45	S	45	No	77.7		11	40	mss	36		5		5	30	MSS	27
gem_74	8	40	MSS	36	No	82.7		10	30	mrms	18		6		3	10	MSS	9
gem_75	6	55	S	55	No	73.3		10	50	s	50		3		5	35	MSS	31.5
gem_77	8	50	S	50	No	70		10	45	mss	40.5		4		3	10	MSS	9
gem_78	9	55	MSS	49.5	No	78		10	55	s	55		7		3	30	M	18
gem_79	9	40	MSS	36	No	82.7		12	35	mss	31.5		4		5	30	MSS	27
gem_80	9	25	M	15	No	71.7		10	25	mss	22.5		4		3	5	MS	4
gem_81	13	45	S	45	No	75.3		12	45	mss	40.5		7		2	60	S	60
gem_82	3	60	S	60	No	73		7	55	s	55		6		4	50	S	50
gem_83	19	35	MSS	31.5	No	85.7		12	25	s	25		6		1	15	MSS	13.5
gem_84	9	20	RMR	6	No	73		11	25	mrms	15		5		3	1	R	0.2
gem_85	11	35	MSS	31.5	No	67.7		13	25	mrms	15		5		2	20	MSS	18
gem_86	11	20	RMR	6	No	69.7		14	15	mrms	9		3		4	20	MSS	18
gem_87	2	20	RMR	6	No	75		6	30	rmr	9		4		4	5	MR	2
gem_88	11	35	M	21	No	75.3		13	30	mrms	18		8		4	10	M	6
gem_90	11	35	MS	28	No	72.3		13	30	mss	27		3		2	1	R	0.2
gem_91	11	45	MSS	40.5	No	74.3		11	50	s	50		4		3	25	MSS	22.5
gem_92	6	20	RMR	6	No	79.3		10	30	rmr	9		5		5	5	MR	2
gem_93	5	45	MSS	40.5	No	75		6	45	s	45		6		5	20	M	12
gem_94	6	35	MSS	31.5	No	68.7		6	35	mrms	21		5		5	1	R	0.2
gem_95	11	45	S	45	No	76.7		12	45	s	45		7		3	15	MSS	13.5
gem_96	8	60	S	60	No	80.3		13	40	mss	36		6		5	20	M	12
gem_98	12	55	S	55	No	81.3		10	35	mss	31.5		4		3	5	MS	4
gem_99	5	65	S	65	No	77		10	45	mrms	27		6		5	30	S	30
gem_100	6	50	S	50	No	74.7		8	35	mrms	21		5		5	10	MSS	9
gem_101	5	25	RMR	7.5	No	80		4	50	s	50		6		6	25	MSS	22.5
gem_102	8	50	S	50	No	76		10	40	mrms	24		4		5	10	MSS	9
gem_103	4	20	RMR	6	No	77.7		6	30	mrms	18		NA		5	20	MSS	18
gem_104	18	30	M	18	No	85.3		20	25	mrms	15		5		3	10	M	6
kudu_1	8	15	MR	6	Yes	69.7		13	10	mrms	6		6		5	10	M	6
kudu_2	4	20	RMR	6	Yes	81.7		8	25	rmr	7.5		6		5	5	M	3
kudu_3	3	20	RMR	6	Yes	78		7	20	mrms	12		6		5	5	M	3
kudu_4	6	35	M	21	No	74.3		10	35	mrms	21		7		5	20	M	12
kudu_5	5	40	S	40	Yes	71		8	35	mrms	21		6		5	30	S	30
kudu_6	9	35	MS	28	Yes	81		12	35	mrms	21		8		4	10	MSS	9
kudu_7	4	35	MS	28	Yes	85		10	35	mrms	21		9		5	40	MSS	36
kudu_8	3	20	RMR	6	Yes	76		8	20	rmr	6		7		4	5	M	3
kudu_9	4	15	RMR	4.5	Yes	72		8	20	rmr	6		6		4	1	R	0.2
kudu_10	9	30	M	18	Yes	76.3		12	30	mss	27		5		4	5	MSS	4.5
kudu_11	7	35	M	21	No	82		11	40	mss	36		9		5	20	MSS	18
kudu_12	4	45	S	45	Yes	83.7		7	35	mrms	21		8		5	30	S	30
kudu_13	15	10	MR	4	Yes	77		21	10	mss	9		7		3	5	RMR	1.5
kudu_14	9	25	M	15	Yes	71.3		13	15	mss	13.5		6		4	10	MSS	9
kudu_15	8	25	M	15	Yes	76.7		12	30	mrms	18		7		6	1	R	0.2
kudu_16	14	40	MSS	36	No	79.3		24	20	mrms	12		6		3	10	M	6
kudu_17	3	35	MS	28	No	79.3		7	30	rmr	9		5		5	20	M	12
kudu_19	1	25	M	15	No	83.7		6	45	s	45		4		5	45	S	45
kudu_20	3	30	M	18	No	86		10	50	s	50		NA		5	15	M	9
kudu_21	3	20	RMR	6	Yes	76.7		10	25	mrms	15		NA		5	0	R	0
kudu_22	4	15	RMR	4.5	No	79.7		6	25	mrms	15		5		4	1	RMR	0.3
kudu_23	3	40	MS	32	Yes	77.3		12	60	s	60		5		6	25	M	15
kudu_24	4	30	MR	12	Yes	71.7		8	30	mrms	18		6		5	5	RMR	1.5
kudu_25	6	20	RMR	6	Yes	79.7		12	20	mrms	12		NA		5	5	MR	2
kudu_26	5	15	RMR	4.5	Yes	82.7		11	30	mrms	18		5		5	0	R	0
kudu_28	8	35	MSS	31.5	Yes	68		13	30	mrms	18		6		4	30	MSS	27
kudu_29	4	20	RMR	6	No	91.3		6	10	mrms	6		5		5	1	R	0.2
kudu_30	15	10	RMR	3	Yes	72.7		28	10	mrms	6		6		3	1	MS	0.8
kudu_31	6	40	S	40	Yes	82.7		14	50	s	50		8		4	40	S	40
kudu_32	4	15	RMR	4.5	No	90.3		10	10	rmr	3		8		5	1	R	0.2
kudu_33	5	55	S	55	Yes	86.3		10	45	mss	40.5		8		5	25	MSS	22.5
kudu_34	3	30	MS	24	Yes	85.3		10	35	mss	31.5		7		5	25	M	15
kudu_35	6	30	MR	12	No	82		13	30	mss	27		7		5	10	MSS	9
kudu_37	4	55	S	55	Yes	84.3		12	45	s	45		5		5	55	S	55
kudu_38	6	35	MSS	31.5	Yes	72.7		12	30	mss	27		8		5	25	MSS	22.5
kudu_39	15	20	MR	8	Yes	75.3		12	30	mss	27		7		3	1	S	1
kudu_40	8	20	MR	8	Yes	72.7		21	15	rmr	4.5		7		5	10	MSS	9
kudu_43	4	10	RMR	3	No	76		10	20	mrms	12		5		5	1	R	0.2
kudu_44	3	25	RMR	7.5	Yes	88		17	30	mrms	18		5		6	15	M	9
kudu_45	2	45	S	45	Yes	77		6	55	s	55		5		4	30	MSS	27
kudu_47	6	10	RMR	3	No	85.3		13	25	mrms	15		4		5	1	R	0.2
kudu_48	11	40	S	40	No	83		21	20	mrms	12		5		5	30	S	30
kudu_50	7	20	M	12	No	76		12	20	mrms	12		6		6	5	M	3
kudu_51	9	15	RMR	4.5	Yes	81		12	15	mrms	9		6		5	1	R	0.2
kudu_52	4	30	M	18	Yes	81		12	20	mrms	12		7		5	40	S	40
kudu_53	2	55	S	55	No	81		4	45	s	45		5		6	25	MSS	22.5
kudu_54	3	35	MSS	31.5	No	85		12	25	mrms	15		5		5	40	S	40
kudu_55	4	30	M	18	Yes	81		9	30	mss	27		4		5	1	R	0.2
kudu_56	3	30	MS	24	No	85		10	35	mss	31.5		5		5	15	M	9
kudu_57	3	45	MSS	40.5	Yes	75		10	30	mrms	18		4		5	40	S	40
kudu_58	6	15	RMR	4.5	Yes	81		14	10	rmr	3		4		5	0	R	0
kudu_59	9	50	S	50	Yes	70		15	30	mrms	18		8		3	40	S	40
kudu_60	11	0	R	0	Yes	76		20	15	mrms	9		6		4	5	MSS	4.5
kudu_61	8	50	S	50	No	70		12	25	mss	22.5		8		4	10	M	6
kudu_62	6	15	RMR	4.5	No	77		25	5	rmr	1.5		5		4	1	R	0.2
kudu_63	6	55	S	55	Yes	78		7	55	s	55		4		5	30	MSS	27
kudu_64	3	55	S	55	Yes	74		8	35	mss	31.5		4		3	25	MSS	22.5
kudu_65	13	40	MSS	36	Yes	71		20	35	mss	31.5		5		5	20	MSS	18
kudu_66	6	40	MS	32	Yes	72		13	30	mss	27		5		2	30	MSS	27
kudu_67	20	15	MSS	13.5	Yes	75		20	25	mss	22.5		6		5	1	R	0.2
kudu_69	3	15	RMR	4.5	Yes	71		9	25	mrms	15		4		5	1	R	0.2
kudu_70	6	20	RMRMS	12	No	71		11	25	mrms	15		4		5	5	M	3
kudu_71	7	30	MS	24	No	83		12	20	mrms	12		5		5	20	MSS	18
kudu_72	3	15	RMR	4.5	Yes	89		13	15	rmr	4.5		4		5	5	M	3
kudu_73	4	35	M	21	No	89		8	30	mrms	18		4		5	5	M	3
kudu_74	4	35	MS	28	Yes	80		10	20	rmr	6		5		5	10	MSS	9
kudu_75	7	45	MSS	40.5	Yes	76		12	30	mrms	18		5		5	30	MSS	27
kudu_76	9	55	S	55	No	81		13	35	mss	31.5		5		4	30	MSS	27
kudu_77	15	40	S	40	No	74		26	15	mrms	9		5		2	20	MSS	18
kudu_79	13	40	S	40	No	75		19	20	mrms	12		6		4	30	MSS	27
kudu_80	16	35	MSS	31.5	Yes	71		12	15	mrms	9		6		2	10	MSSS	9
kudu_81	8	30	MS	24	Yes	75		13	20	mrms	12		6		5	5	M	3
kudu_82	6	10	RMR	3	No	85		12	15	mrms	9		6		5	0	R	0
kudu_83	6	30	MSS	27	Yes	87		7	20	mrms	12		6		5	10	MSS	9
kudu_84	6	20	M	12	No	70		10	15	mrms	9		6		5	25	MSS	22.5
kudu_85	6	15	M	9	Yes	80		7	20	mrms	12		5		5	10	M	6
kudu_86	9	15	RMR	4.5	Yes	86		13	15	rmr	4.5		6		4	5	M	3
kudu_87	4	20	RMR	6	No	77		6	15	rmr	4.5		7		5	1	R	0.2
kudu_88	6	10	RMR	3	Yes	72		7	15	rmr	4.5		3		6	1	R	0.2
kudu_89	3	20	M	12	Yes	91		4	20	rmr	6		5		5	5	M	3
kulungu_1	9	30	MS	24	Yes	83.7		12	15	rmr	4.5		4		5	30	MSS	27
kulungu_3	18	15	MS	12	No	91.3		21	10	r	2		7		3	5	MS	4
kulungu_4	16	20	MS	16	No	82.7		20	10	r	2		7		3	15	MSS	13.5
kulungu_5	9	65	S	65	No	90.7		12	20	mss	18		7		6	60	S	60
kulungu_6	9	15	RMR	4.5	No	83		9	15	mrms	9		5		6	5	MSS	4.5
kulungu_7	12	15	RMR	4.5	Yes	77.7		18	15	mrms	9		5		3	10	MSS	9
kulungu_8	11	20	S	20	Yes	83.7		13	20	mrms	12		6		4	1	S	1
kulungu_9	10	30	M	18	Yes	80		14	15	rmr	4.5		7		5	10	M	6
kulungu_10	9	40	MSS	36	Yes	81.3		12	20	mss	18		6		5	40	S	40
kulungu_12	12	20	M	12	Yes	75		21	10	rmr	3		7		3	1	M	0.6
kulungu_13	17	15	M	9	Yes	85.7		21	10	rmr	3		7		2	5	MS	4
kulungu_15	11	35	MS	28	Yes	75.7		14	20	mss	18		6		5	20	MSS	18
kulungu_17	11	30	MS	24	No	79.3		17	25	mss	22.5		7		3	10	MSS	9
kulungu_18	10	15	MSS	13.5	No	73.7		14	15	mss	13.5		6		3	5	MS	4
kulungu_19	11	25	MSS	22.5	Yes	81.7		18	20	mrms	12		5		3	5	M	3
kulungu_20	19	20	MSS	18	No	75.3		13	20	mss	18		7		2	1	MR	0.4
kulungu_21	9	30	M	18	Yes	85		12	20	mrms	12		7		4	20	MSS	18
kulungu_22	13	10	MS	8	Yes	84.3		21	5	r	1		6		4	10	M	6
kulungu_23	8	30	MS	24	Yes	70.7		13	20	mrms	12		NA		5	25	MSS	22.5
kulungu_24	19	15	MS	12	Yes	65.7		30	5	ms	4		5		1	5	M	3
kulungu_25	13	30	MSS	27	Yes	80.7		20	15	mss	13.5		8		3	30	MSS	27
kulungu_26	13	20	M	12	No	86.3		21	10	mr	4		5		3	5	M	3
kulungu_27	10	35	S	35	No	79.3		12	25	mss	22.5		5		3	10	MSS	9
kulungu_28	17	20	M	12	No	80.3		22	15	mrms	9		8		4	1	S	1
kulungu_29	10	30	MSS	27	Yes	88.5		18	15	mrms	9		4		3	5	M	3
kulungu_30	11	35	MSS	31.5	No	73		26	15	mss	13.5		8		4	5	M	3
kulungu_31	14	25	M	15	No	71.7		19	20	mrms	12		5		3	5	M	3
kulungu_32	9	20	M	12	No	83.7		12	20	rmr	6		6		4	10	MSS	9
kulungu_35	9	35	MSS	31.5	Yes	75		13	15	mrms	9		4		5	10	MSS	9
kulungu_36	13	15	M	9	Yes	76.7		20	10	rmr	3		5		4	5	MSS	4.5
kulungu_37	16	15	MS	12	Yes	83.3		21	10	rmr	3		7		4	0	R	0
kulungu_39	10	15	M	9	No	85.3		14	15	mss	13.5		7		5	5	M	3
kulungu_42	11	35	M	21	Yes	77.3		14	25	s	25		7		4	30	S	30
kulungu_43	11	20	MS	16	No	81		19	10	rmr	3		5		5	20	MSS	18
kulungu_44	10	40	S	40	No	78		12	25	mss	22.5		6		5	5	M	3
kulungu_45	11	20	S	20	No	92.7		14	15	mrms	9		4		5	20	MSS	18
kulungu_46	12	20	M	12	Yes	82.3		20	10	rmr	3		6		4	5	M	3
kulungu_47	11	30	S	30	Yes	77.3		13	15	mrms	9		8		5	40	S	40
kulungu_48	19	10	MS	8	No	74.3		26	15	mrms	9		5		2	1	R	0.2
kulungu_49	11	20	RMR	6	Yes	86.7		14	15	rmr	4.5		9		5	15	M	9
kulungu_50	12	25	MS	20	No	78.3		20	25	mss	22.5		8		4	5	MS	4
kulungu_51	9	30	M	18	Yes	84.7		13	10	rmr	3		6		5	5	MSS	4.5
kulungu_52	12	40	S	40	No	83.3		21	25	mrms	15		5		4	5	M	3
kulungu_53	6	40	S	40	No	85.3		12	20	mss	18		7		5	20	M	12
kulungu_54	11	20	M	12	Yes	90		17	10	rmr	3		7		4	10	M	6
kulungu_55	16	15	M	9	Yes	74		22	10	rmr	3		9		3	0	R	0
kulungu_56	13	30	MS	24	Yes	73.3		19	20	mrms	12		7		4	5	M	3
kulungu_57	10	50	S	50	Yes	80.7		12	25	mss	22.5		5		4	30	S	30
kulungu_58	11	40	S	40	No	78		14	20	mrms	12		5		5	10	MSS	9
kulungu_59	12	25	M	15	Yes	80.3		19	15	mrms	9		7		4	10	M	6
kulungu_62	13	15	MSS	13.5	Yes	76.3		19	10	rmr	3		6		5	5	MR	2
kulungu_65	4	15	M	9	No	70.7		7	25	mrms	15		5		5	5	M	3
kulungu_66	8	15	RMR	4.5	Yes	72.3		12	25	mrms	15		4		5	1	R	0.2
kulungu_67	2	45	S	45	No	78.7		2	35	mrms	21		6		6	5	S	5
kulungu_68	8	20	M	12	Yes	82.3		12	15	rmr	4.5		5		5	5	M	3
kulungu_69	3	20	RMR	6	No	78.7		6	20	rmr	6		4		5	5	M	3
kulungu_70	3	40	S	40	No	68		11	40	mss	36		6		5	30	MS	24
kulungu_71	2	35	MS	28	No	82.3		6	35	mrms	21		5		5	30	MSS	27
kulungu_72	10	30	M	18	No	62		18	10	rmr	3		NA		5	25	MSS	22.5
ngiri_2	2	20	M	12	Yes	71.3		2	25	rmr	7.5		4		6	5	RMR	1.5
ngiri_3	9	15	M	9	Yes	55.7		13	15	rmr	4.5		6		5	0	R	0
ngiri_4	22	0	R	0	No	79		30	10	r	2		5		6	5	MSS	4.5
ngiri_7	6	20	RMR	6	Yes	65.7		7	25	rmr	7.5		4		6	5	M	3
ngiri_8	4	15	MR	6	Yes	62.7		5	25	rmr	7.5		6		6	5	M	3
ngiri_9	6	15	RMR	4.5	Yes	71.7		11	20	rmr	6		5		6	20	MSS	18
ngiri_10	18	20	MS	16	Yes	64.7		28	15	rmr	4.5		6		3	5	MSS	4.5
ngiri_11	6	25	RMR	7.5	No	68.3		11	25	rmr	7.5		6		5	15	S	15
ngiri_12	2	40	MS	32	Yes	83.3		4	55	s	55		NA		5	50	S	50
ngiri_13	3	20	MR	8	Yes	69.3		2	30	mrms	18		3		5	20	MSS	18
ngiri_14	6	25	M	15	Yes	70		10	25	mrms	15		4		5	40	S	40
ngiri_15	9	20	MR	8	No	74.7		13	20	mrms	12		7		5	10	MSS	9
ngiri_16	4	30	MS	24	Yes	80.7		7	40	mrms	24		7		5	10	M	6
ngiri_17	17	15	RMR	4.5	Yes	67.3		20	15	rmr	4.5		5		3	1	R	0.2
ngiri_18	15	15	RMR	4.5	Yes	69.3		18	15	rmr	4.5		6		3	10	MS	8
ngiri_19	8	25	M	15	No	83		9	35	mrms	21		6		5	30	MSS	27
ngiri_21	20	10	MSS	9	Yes	75.3		28	10	mrms	6		5		3	1	R	0.2
ngiri_23	23	0	M	0	No	57		26	10	rmr	3		6		3	5	MSS	4.5
ngiri_25	6	20	MR	8	No	59.7		9	20	rmr	6		NA		5	5	R	1
ngiri_26	11	20	MR	8	No	74.3		15	20	rmr	6		7		5	5	M	3
ngiri_27	12	35	MSS	31.5	Yes	67.3		19	20	mrms	12		9		5	35	S	35
ngiri_28	12	20	RMR	6	No	76		22	10	mr	4		9		3	5	MSS	4.5
ngiri_29	4	35	MS	28	No	71		6	50	s	50		8		6	15	MSS	13.5
ngiri_30	13	20	M	12	No	63.3		18	25	mrms	15		9		4	20	S	20
ngiri_32	16	20	M	12	No	68		21	15	rmr	4.5		7		3	5	MSS	4.5
ngiri_33	3	20	RMR	6	Yes	79.7		10	35	mrms	21		6		6	15	M	9
ngiri_34	6	20	MR	8	Yes	65.3		9	20	rmr	6		6		6	30	MSS	27
ngiri_35	22	0	R	0	No	73		30	10	rmr	3		6		3	25	MSS	22.5
ngiri_36	3	30	MS	24	No	64.7		4	60	s	60		NA		6	30	S	30
ngiri_38	5	35	MSS	31.5	No	77		12	35	mrms	21		5		5	30	S	30
ngiri_39	4	35	MSS	31.5	Yes	68.7		6	60	s	60		5		5	20	M	12
ngiri_40	5	30	MSS	27	No	80.7		9	40	mrms	24		7		5	20	MSS	18
ngiri_42	17	0	R	0	Yes	70.7		26	5	r	1		5		3	5	MSS	4.5
ngiri_43	8	50	S	50	No	80.7		12	35	mss	31.5		6		5	40	S	40
ngiri_44	23	10	MSS	9	Yes	46		30	5	r	1		6		2	15	MSS	13.5
ngiri_45	18	15	M	9	No	66.3		30	10	rmr	3		7		4	30	MSS	27
ngiri_46	3	40	S	40	No	82.7		7	65	s	65		7		5	30	MSS	27
ngiri_47	4	40	S	40	No	82.3		9	55	s	55		8		5	30	S	30
ngiri_48	3	15	M	9	No	62		7	25	rmr	7.5		9		6	20	M	12
ngiri_49	5	20	M	12	Yes	59		7	20	rmr	6		6		5	30	M	18
ngiri_50	6	25	MRMSS	17.5	No	83.7		11	30	rmr	9		6		5	15	MSS	13.5
ngiri_51	6	15	RMR	4.5	No	63.7		12	20	rmr	6		6		5	10	MSS	9
ngiri_52	3	25	M	15	Yes	77		7	20	mrms	12		6		5	25	MSS	22.5
ngiri_53	8	20	RMR	6	No	81		10	10	rmr	3		5		4	10	MSS	9
ngiri_54	22	15	MSS	13.5	No	70		30	NA	NA	NA		4		3	1	R	0.2
ngiri_55	20	30	MSS	27	No	70		30	15	mss	13.5		3		3	10	MSS	9
ngiri_57	13	20	M	12	Yes	66.3		18	25	mss	22.5		5		4	30	S	30
ngiri_58	8	35	MS	28	Yes	81.7		12	30	mrms	18		4		5	40	S	40
ngiri_59	10	10	M	6	No	52.3		19	15	rmr	4.5		6		5	1	R	0.2
ngiri_60	6	30	MSS	27	Yes	81		13	40	mrms	24		5		5	25	MS	20
ngiri_61	3	25	M	15	Yes	82.7		7	40	mrms	24		NA		5	30	MS	24
ngiri_64	6	25	MRMSS	17.5	No	68.7		6	30	rmr	9		NA		5	35	MSS	31.5
paka_2	11	25	MRMSS	17.5	Yes	53.7		19	10	mss	9		6		5	5	M	3
paka_3	13	45	S	45	Yes	71.3		17	25	mss	22.5		5		4	10	MSS	9
paka_4	5	20	RMR	6	Yes	86.3		6	30	rmr	9		3		5	10	M	6
paka_5	4	45	S	45	No	71.3		4	60	s	60		NA		5	30	S	30
paka_6	4	25	MRMSS	17.5	Yes	77		6	25	rmr	7.5		5		6	10	MSS	9
paka_7	14	25	MSS	22.5	Yes	56.3		13	25	mss	22.5		6		4	1	M	0.6
paka_8	11	20	MR	8	No	70.7		14	15	mrms	9		5		4	30	S	30
paka_9	12	20	MR	8	Yes	68.3		14	15	mrms	9		6		5	1	R	0.2
paka_10	6	35	MS	28	Yes	76		7	35	mrms	21		6		5	15	MSS	13.5
paka_12	3	25	MSS	22.5	No	66.7		6	60	s	60		5		5	25	MS	20
paka_14	15	25	M	15	Yes	69.7		25	15	rmr	4.5		7		3	20	M	12
paka_15	13	25	MS	20	Yes	76.3		19	15	rmr	4.5		5		3	10	MSS	9
paka_16	17	15	M	9	No	48.7		11	20	rmr	6		2		3	5	MSS	4.5
paka_17	8	20	M	12	Yes	71		7	20	rmr	6		4		5	15	M	9
paka_18	7	35	MS	28	No	58.7		11	45	mss	40.5		5		5	20	M	12
paka_19	15	25	MS	20	No	55.3		21	15	rmr	4.5		5		4	15	M	9
paka_20	9	15	M	9	Yes	55.7		8	15	rmr	4.5		4		5	10	MR	4
paka_22	4	20	M	12	No	74.3		10	15	rmr	4.5		6		4	5	MSS	4.5
paka_23	4	15	MR	6	No	54		6	25	mrms	15		5		5	1	R	0.2
paka_24	9	15	MR	6	Yes	52.7		12	20	mrms	12		6		5	5	MS	4
paka_25	2	20	MR	8	Yes	77.7		4	25	mrms	15		5		6	35	MS	28
paka_26	4	25	M	15	Yes	72		9	20	rmr	6		4		5	50	S	50
paka_27	20	25	MRMSS	17.5	No	85.3		21	10	rmr	3		5		3	25	S	25
paka_28	13	20	MR	8	Yes	72.5		19	10	rmr	3		5		4	15	M	9
paka_29	3	25	M	15	Yes	74.3		3	60	s	60		6		6	20	MR	8
paka_30	5	25	M	15	Yes	77.3		8	35	mrms	21		NA		5	30	S	30
paka_31	11	25	MS	20	Yes	45		12	20	rmr	6		6		5	5	MS	4
paka_32	20	15	M	9	No	62		23	10	rmr	3		9		3	20	MSS	18
paka_33	3	25	M	15	No	71.3		6	45	mrms	27		7		6	20	M	12
paka_34	16	20	M	12	No	65.7		20	15	rmr	4.5		7		3	20	M	12
paka_35	9	30	MSS	27	No	68.3		14	35	mss	31.5		6		5	30	MSS	27
paka_36	14	15	MS	12	No	55.7		20	15	mrms	9		7		3	5	MS	4
paka_37	5	15	MR	6	Yes	75.3		10	25	rmr	7.5		7		6	15	M	9
paka_38	4	10	MR	4	Yes	61.7		6	20	rmr	6		6		6	5	M	3
paka_39	9	10	MR	4	No	54.7		12	15	rmr	4.5		5		5	1	R	0.2
paka_40	4	15	M	9	Yes	51.3		6	25	rmr	7.5		6		5	10	RMR	3
paka_41	4	25	MSS	22.5	Yes	70.7		7	50	mss	45		6		5	15	M	9
paka_42	5	15	MR	6	Yes	85.3		10	25	rmr	7.5		6		5	10	M	6
paka_43	2	20	MR	8	No	78		6	20	rmr	6		5		6	20	MSS	18
paka_44	11	50	S	50	No	76		15	30	mss	27		5		5	25	MSS	22.5
paka_45	2	25	MRMSS	17.5	No	74.7		1	50	s	50		NA		5	5	RMR	1.5
paka_47	3	20	MR	8	Yes	75.7		6	20	rmr	6		NA		5	20	MSS	18
paka_48	4	10	MR	4	Yes	59.3		6	20	rmr	6		NA		5	5	M	3
paka_49	4	20	MR	8	No	65.3		7	20	rmr	6		NA		5	15	M	9
paka_50	19	15	M	9	No	55		22	15	rmr	4.5		4		3	5	MSS	4.5
paka_51	4	40	MS	32	Yes	65		6	30	mrms	18		NA		6	20	MS	16
paka_52	15	15	M	9	No	68.3		21	10	rmr	3		4		3	5	MSS	4.5
paka_53	5	25	M	15	Yes	76.3		7	45	mrms	27		5		5	35	S	35
paka_55	8	35	MSS	31.5	Yes	59		12	30	mss	27		4		5	1	RMR	0.3
paka_56	19	10	MR	4	Yes	67.7		11	10	rmr	3		6		2	1	S	1
paka_57	6	20	M	12	Yes	78		7	20	mrms	12		5		5	10	MSS	9
paka_58	13	40	S	40	Yes	58.7		19	25	mss	22.5		5		4	20	M	12
paka_59	12	30	MSS	27	Yes	62.3		19	15	mrms	9		5		4	10	MSS	9
paka_60	4	20	M	12	No	52.3		7	30	rmr	9		6		5	5	M	3
paka_61	5	20	M	12	No	58.3		7	20	rmr	6		5		5	5	M	3
paka_62	3	25	M	15	No	61.3		5	30	rmr	9		5		5	15	M	9
paka_63	2	25	M	15	Yes	77.3		4	40	mrms	24		6		5	20	MSS	18
paka_64	9	40	S	40	Yes	49.7		7	40	mrms	24		5		6	20	MS	16
paka_65	14	20	M	12	Yes	76.3		20	15	ms	12		6		3	10	M	6
paka_66	3	20	M	12	Yes	69.3		1	35	rmr	10.5		NA		6	50	S	50
paka_67	3	20	M	12	No	69		4	40	ms	32		7		5	15	MSS	13.5
paka_68	8	20	M	12	Yes	66		11	20	rmr	6		6		5	5	RMR	1.5
paka_69	10	15	MR	6	No	77		15	15	rmr	4.5		5		4	5	MS	4
paka_70	7	30	M	18	No	91		6	40	rmr	12		5		5	30	S	30
paka_71	4	20	MR	8	Yes	77		7	20	mss	18		4		4	10	M	6
paka_72	3	15	MR	6	No	67		6	25	rmr	7.5		5		5	10	MSS	9
paka_73	3	25	MR	10	Yes	64		7	15	mrms	9		5		5	5	M	3
paka_74	20	0	R	0	Yes	70		30	5	rmr	1.5		4		2	5	M	3
paka_75	9	35	MSS	31.5	Yes	81		11	35	mss	31.5		4		5	10	M	6
paka_76	3	25	M	15	No	74		6	40	mrms	24		NA		5	25	M	15
paka_77	3	35	MSS	31.5	No	86		2	20	mrms	12		3		5	25	MSS	22.5
paka_78	3	20	M	12	No	71		2	50	mr	20		6		5	15	MSS	13.5
paka_79	5	15	MR	6	Yes	62		9	30	mrms	18		7		5	10	MS	8
paka_80	12	30	MSS	27	No	92		13	25	mrms	15		4		4	10	M	6
paka_81	3	30	M	18	No	75		1	40	mrms	24		5		6	20	MS	16
paka_82	20	10	MSS	9	No	61		6	40	rmr	12		3		4	20	MSS	18
paka_83	9	15	MR	6	No	58		7	20	rmr	6		4		5	5	M	3
paka_84	2	35	M	21	No	75		6	40	mrms	24		5		6	30	MSS	27
paka_85	2	25	M	15	Yes	70		4	45	mss	40.5		5		5	35	MSS	31.5
paka_86	2	20	M	12	No	81		4	35	mrms	21		5		6	20	MS	16
paka_87	6	15	MR	6	Yes	75		10	20	mrms	12		4		5	40	S	40
paka_88	17	0	R	0	Yes	48		21	5	mss	4.5		3		4	5	M	3
paka_89	9	20	M	12	Yes	65		13	15	mss	13.5		5		5	25	MSS	22.5
paka_90	7	25	MSS	22.5	No	81		10	20	mrms	12		4		5	30	S	30
paka_92	14	15	MR	6	Yes	79		20	10	rmr	3		3		3	10	M	6
paka_93	6	35	MSS	31.5	Yes	66		11	30	mss	27		5		5	30	MSS	27
paka_94	6	25	MSS	22.5	No	74		9	25	mrms	15		5		6	35	S	35
paka_95	3	20	MSS	18	Yes	75		3	35	mrms	21		NA		6	20	M	12
paka_96	4	45	S	45	No	84		6	30	mss	27		5		6	40	S	40
paka_97	3	25	MR	10	Yes	76		6	30	mrms	18		NA		6	35	MSS	31.5
paka_98	2	45	S	45	No	86		6	40	mrms	24		NA		5	35	S	35
paka_99	4	30	MSS	27	No	79		7	55	mss	49.5		8		6	40	MSS	36
paka_103	6	25	M	15	Yes	70		11	20	mrms	12		5		5	20	MSS	18
paka_104	14	10	MR	4	No	68		21	10	mrms	6		3		3	5	MSS	4.5
paka_105	4	30	MSS	27	Yes	69		10	40	mss	36		5		5	35	S	35
paka_107	5	40	S	40	Yes	72		6	50	mss	45		5		5	40	S	40
paka_108	3	40	S	40	No	50		6	45	mss	40.5		5		5	25	MSS	22.5
paka_109	1	35	M	21	No	86		6	35	mrms	21		4		5	40	S	40
paka_110	3	40	S	40	Yes	80		7	40	mss	36		5		5	25	S	25
paka_111	7	30	MSS	27	Yes	83		10	30	mrms	18		5		5	30	MSS	27
paka_112	16	20	M	12	No	72		12	10	rmr	3		8		4	25	M	15
paka_114	9	25	M	15	Yes	73		13	15	rmr	4.5		6		5	15	M	9
paka_115	9	30	S	30	No	74		13	35	mss	31.5		7		5	25	S	25
paka_116	3	25	MRMSS	17.5	No	81		7	25	rmr	7.5		7		6	20	MSS	18
pasa_1	18	15	MSS	13.5	Yes	78.7		23	10	mrms	6		4		2	1	S	1
pasa_2	9	5	R	1	No	62.3		12	10	rmr	3		5		4	5	M	3
pasa_3	9	15	MR	6	Yes	75		12	15	rmr	4.5		10		4	10	M	6
pasa_4	5	30	M	18	Yes	59.7		12	45	mss	40.5		7		5	15	M	9
pasa_5	6	45	S	45	No	87.7		7	35	mrms	21		10		4	10	M	6
pasa_6	5	10	RMR	3	No	88		7	10	rmr	3		6		5	1	R	0.2
pasa_7	4	35	MS	28	Yes	71.3		6	40	mss	36		NA		6	20	M	12
pasa_8	10	10	RMR	3	No	59		15	15	mrms	9		5		4	5	MS	4
pasa_9	9	25	M	15	Yes	72.7		9	30	mss	27		10		4	20	MSS	18
pasa_10	10	50	S	50	Yes	84.3		13	40	mss	36		6		4	20	MSS	18
pasa_11	9	35	S	35	No	78.3		13	25	mss	22.5		7		3	10	MSS	9
pasa_12	6	15	MR	6	Yes	62.3		12	15	rmr	4.5		5		5	10	RMR	3
pasa_13	6	25	M	15	Yes	81.7		12	25	mrms	15		5		5	15	M	9
pasa_15	10	50	S	50	Yes	78.3		14	45	s	45		10		2	20	MSS	18
pasa_18	17	35	MSS	31.5	Yes	70		26	45	s	45		6		1	15	MSS	13.5
pasa_19	6	35	MS	28	Yes	81		12	35	mrms	21		5		5	20	MSS	18
pasa_21	9	15	MR	6	Yes	76.3		12	20	rmr	6		10		4	10	M	6
pasa_22	8	15	MR	6	No	82.3		12	15	rmr	4.5		4		5	1	R	0.2
pasa_23	14	25	MS	20	Yes	87		20	20	mss	18		5		3	10	M	6
pasa_24	9	25	MS	20	No	79		15	25	mss	22.5		7		4	10	M	6
pasa_25	3	30	MS	24	No	76		6	20	rmr	6		8		5	25	MSS	22.5
pasa_26	10	20	MS	16	No	63		15	20	mss	18		9		3	5	MS	4
pasa_27	18	20	MS	16	No	79		24	15	mrms	9		3		3	5	M	3
pasa_28	13	15	R	3	Yes	81.7		20	10	rmr	3		6		1	5	MS	4
pasa_29	10	25	MS	20	No	79		20	30	mss	27		10		2	5	M	3
pasa_30	8	25	M	15	Yes	85		12	15	rmr	4.5		6		4	15	MSS	13.5
pasa_31	13	15	M	9	No	62.3		26	15	mrms	9		5		1	1	R	0.2
pasa_32	4	15	M	9	Yes	61.3		5	30	rmr	9		7		5	15	M	9
pasa_33	5	20	MR	8	Yes	71.7		6	35	rmr	10.5		NA		5	10	M	6
pasa_34	12	35	MSS	31.5	Yes	72.7		19	35	mss	31.5		4		4	20	MSS	18
pasa_35	10	40	MS	32	Yes	84.7		13	40	s	40		8		4	20	MSS	18
pasa_37	6	15	RMR	4.5	Yes	62.7		7	15	rmr	4.5		3		5	5	RMR	1.5
pasa_38	3	10	RMR	3	Yes	78.3		7	15	rmr	4.5		6		5	1	R	0.2
pasa_39	4	20	MR	8	Yes	89.7		10	20	mrms	12		6		5	5	RMR	1.5
pasa_41	10	15	MR	6	No	81.3		13	15	rmr	4.5		3		1	5	MSS	4.5
pasa_42	13	15	R	3	Yes	69.3		19	15	r	3		7		5	15	MSS	13.5
pasa_43	7	35	MS	28	No	77		11	45	s	45		4		5	25	MSS	22.5
pasa_44	9	10	R	2	No	86.7		10	35	mss	31.5		6		5	5	M	3
pasa_46	13	25	MSS	22.5	No	75		20	20	s	20		10		2	10	MSS	9
pasa_48	8	45	S	45	Yes	66.3		11	40	s	40		10		5	15	MSS	13.5
pasa_51	10	50	S	50	Yes	71.3		15	35	mss	31.5		8		4	15	MSS	13.5
pasa_52	8	30	M	18	No	82.3		10	45	mrms	27		6		5	10	M	6
pasa_53	8	20	MR	8	No	86		12	15	rmr	4.5		10		3	1	MS	0.8
pasa_54	11	10	R	2	No	58.3		12	15	rmr	4.5		9		2	5	MS	4
pasa_55	11	10	R	2	No	61.3		18	10	rmr	3		10		5	1	MS	0.8
pasa_56	13	15	MR	6	No	61.7		20	15	rmr	4.5		6		1	5	MS	4
pasa_57	13	10	MR	4	No	67.7		18	10	rmr	3		6		1	5	MSS	4.5
pasa_58	15	15	RMRMS	9	Yes	73.7		22	15	mrms	9		5		3	5	MSS	4.5
pasa_59	20	15	MSS	13.5	Yes	67.7		30	15	mss	13.5		4		1	5	MS	4
pasa_60	13	35	MSS	31.5	Yes	79.7		22	20	mss	18		6		1	10	MS	8
pasa_61	9	55	S	55	Yes	70		14	35	s	35		7		5	10	M	6
pasa_62	16	25	M	15	No	80.3		18	25	mss	22.5		7		4	15	MSS	13.5
pasa_63	13	10	MSS	9	No	58.7		20	10	mrms	6		5		4	5	MSS	4.5
pasa_64	18	30	MSS	27	No	79.7		26	15	mss	13.5		5		1	5	MS	4
pasa_66	12	25	M	15	Yes	59		14	20	rmr	6		5		2	5	MSS	4.5
pasa_67	14	30	MSS	27	Yes	72		30	20	mss	18		8		1	10	MSS	9
pasa_68	16	15	M	9	Yes	54.3		22	5	rmr	1.5		6		4	20	MSS	18
pasa_69	18	10	MSS	9	Yes	72.7		10	10	rmr	3		3		1	5	MS	4
pasa_70	16	15	MSS	13.5	Yes	50.3		21	15	mss	13.5		5		4	1	M	0.6
pasa_71	9	45	S	45	Yes	56.3		9	45	mss	40.5		5		5	15	MSS	13.5
pasa_72	15	5	MR	2	Yes	56.3		13	10	rmr	3		6		4	10	M	6
pasa_73	9	45	S	45	No	59.3		12	45	s	45		6		5	25	MSS	22.5
pasa_74	12	40	S	40	No	73.7		17	20	mss	18		6		4	25	MSS	22.5
pasa_75	10	25	MSS	22.5	Yes	49		12	20	mrms	12		5		5	10	M	6
pasa_76	14	35	MSS	31.5	Yes	66.7		26	25	mss	22.5		5		3	10	M	6
pasa_77	13	30	MS	24	No	75.7		22	15	mrms	9		6		3	15	MSS	13.5
pasa_79	9	20	MS	16	Yes	63.7		14	35	mss	31.5		5		5	10	MSS	9
pasa_80	6	15	M	9	No	65.7		10	25	mrms	15		NA		5	5	RMR	1.5
pasa_81	11	40	S	40	No	73.3		14	30	mss	27		5		5	10	MSS	9
pasa_82	9	10	M	6	Yes	69.7		12	10	rmr	3		6		5	1	R	0.2
pasa_83	9	35	S	35	Yes	74.3		13	30	mss	27		5		5	15	MSS	13.5
pasa_84	5	40	S	40	No	72		7	40	mrms	24		NA		5	10	RMR	3
pasa_85	14	15	MSS	13.5	Yes	70		15	10	rmr	3		3		3	10	M	6
pasa_86	9	20	M	12	Yes	67		13	20	mrms	12		5		6	10	M	6
pasa_87	15	15	MSS	13.5	No	46.7		10	10	mrms	6		4		1	5	M	3
pasa_88	11	15	M	9	No	61.3		13	15	mrms	9		4		2	10	M	6
pasa_89	6	15	M	9	No	63		12	15	mrms	9		6		5	15	M	9
pasa_90	14	40	S	40	No	63		20	30	mss	27		8		1	30	S	30
pasa_91	9	40	S	40	No	83.7		13	35	mrms	21		7		3	30	S	30
pasa_92	9	15	M	9	No	72.7		12	15	mrms	9		6		5	10	M	6
pasa_94	9	10	RMR	3	Yes	66		12	15	rmr	4.5		3		5	1	MR	0.4
pasa_95	9	15	R	3	Yes	79		12	20	mrms	12		5		5	10	MSS	9
pasa_96	9	10	R	2	No	55		15	15	mrms	9		5		1	0	R	0
pasa_97	8	15	MR	6	No	72.3		12	15	mrms	9		3		5	5	MSS	4.5
pasa_98	13	15	M	9	No	65.3		20	10	rmr	3		6		3	10	MSS	9
pasa_99	17	15	M	9	No	78		25	10	rmr	3		NA		2	1	R	0.2
pasa_100	14	15	MS	12	Yes	76.3		20	15	rmr	4.5		4		3	10	MSS	9
pasa_101	4	30	M	18	Yes	81.3		7	50	s	50		6		5	30	MSS	27
pasa_102	4	15	M	9	Yes	61		7	30	mrms	18		NA		5	10	M	6
pasa_103	19	20	M	12	No	77.3		22	15	mrms	9		3		3	5	MSS	4.5
pasa_104	9	35	MSS	31.5	No	72.7		12	40	mss	36		5		4	15	MSS	13.5
pasa_105	6	15	M	9	No	70		6	25	mrms	15		6		5	10	M	6
pasa_106	8	25	M	15	Yes	78		15	15	rmr	4.5		6		5	5	M	3
popo_1	5	30	MS	24	Yes	85		11	45	mss	40.5		5		5	20	MSS	18
popo_2	10	45	S	45	No	65.7		13	40	mss	36		7		5	5	MSS	4.5
popo_3	12	30	MSS	27	Yes	68.7		10	35	mss	31.5		8		5	20	MSS	18
popo_4	10	40	S	40	No	83		13	25	mss	22.5		7		5	5	M	3
popo_5	21	15	MSS	13.5	No	69.7		20	15	mrms	9		7		2	5	MSS	4.5
popo_6	9	40	MSS	36	No	80.3		19	25	mss	22.5		8		5	10	M	6
popo_7	10	25	MRMSS	17.5	No	82.3		12	20	mrms	12		6		4	1	R	0.2
popo_8	17	20	MS	16	No	83		27	10	mrms	6		6		2	5	MSS	4.5
popo_9	13	20	M	12	No	70.7		14	15	mrms	9		5		5	10	MSS	9
popo_10	12	20	M	12	Yes	75		13	25	mrms	15		4		5	10	MSS	9
popo_11	12	25	M	15	No	65.3		13	25	mss	22.5		NA		4	10	MSS	9
popo_12	17	15	MSS	13.5	Yes	87		26	15	rmr	4.5		3		4	10	MS	8
popo_13	12	50	S	50	No	77.3		12	45	s	45		4		5	15	MSS	13.5
popo_14	8	25	MS	20	Yes	86		12	20	mrms	12		8		5	50	S	50
popo_15	15	25	MSS	22.5	Yes	83		21	10	mss	9		5		5	10	MSS	9
popo_16	20	15	MSS	13.5	Yes	80		26	15	mss	13.5		4		2	1	MR	0.4
popo_17	10	35	MSS	31.5	Yes	83.7		12	20	mrms	12		5		4	10	MSS	9
popo_18	9	60	S	60	No	86		12	45	s	45		6		4	15	MSS	13.5
popo_19	12	15	M	9	No	75.3		13	25	mrms	15		8		5	1	MR	0.4
popo_20	10	40	MSS	36	No	75.7		15	20	mss	18		8		5	1	R	0.2
popo_21	14	30	MSS	27	No	86.7		20	15	mrms	9		3		3	1	R	0.2
popo_22	4	25	MSS	22.5	Yes	78.3		12	30	mss	27		6		5	10	M	6
popo_23	14	25	MSS	22.5	No	75.3		20	15	rmr	4.5		7		3	5	M	3
popo_25	21	10	MS	8	Yes	65		24	15	rmr	4.5		8		1	5	MS	4
popo_26	17	30	MSS	27	No	76.3		23	15	s	15		10		2	1	M	0.6
popo_27	9	30	S	30	No	82.7		12	20	mrms	12		10		5	20	MSS	18
popo_28	10	25	MS	20	Yes	76.3		12	30	mss	27		8		4	10	M	6
popo_29	14	20	MS	16	Yes	72.3		22	15	s	15		4		4	5	MS	4
popo_30	9	45	MSS	40.5	Yes	78.3		12	35	s	35		5		4	15	MSS	13.5
popo_31	12	40	S	40	Yes	69		11	30	s	30		6		3	1	MR	0.4
popo_32	10	15	M	9	Yes	75.7		13	15	mrms	9		10		5	1	M	0.6
popo_33	9	30	MS	24	No	77.3		12	40	mss	36		10		5	5	M	3
popo_34	13	25	MSS	22.5	No	75		19	20	mss	18		7		4	5	MSS	4.5
popo_35	19	10	M	6	Yes	81		26	15	rmr	4.5		4		3	5	MSS	4.5
popo_36	10	40	MSS	36	No	73.3		13	25	mss	22.5		5		5	5	MSS	4.5
popo_39	9	70	S	70	Yes	75.3		13	50	s	50		10		5	25	MSS	22.5
popo_40	19	30	S	30	Yes	61.7		6	35	mrms	21		4		5	10	MSS	9
popo_41	22	25	MSS	22.5	Yes	67.3		13	25	mrms	15		4		4	1	R	0.2
popo_42	3	40	MSS	36	Yes	95.7		8	40	mrms	24		7		5	15	MSS	13.5
popo_43	11	30	MS	24	No	77.7		13	30	mss	27		8		4	20	MSS	18
popo_44	13	15	M	9	No	72.7		24	10	rmr	3		10		3	5	RMR	1.5
popo_45	11	25	MSS	22.5	No	71.3		14	15	mss	13.5		5		4	10	MSS	9
popo_46	10	30	MSS	27	Yes	73		12	25	mrms	15		4		5	10	MSS	9
popo_47	4	20	M	12	Yes	85.3		9	25	mrms	15		NA		5	5	RMR	1.5
popo_48	9	20	M	12	No	81.7		12	15	mrms	9		6		5	5	RMR	1.5
popo_49	20	10	M	6	No	68.3		30	0	r	0		7		2	5	M	3
popo_50	8	35	MSS	31.5	No	88.3		12	30	mss	27		6		4	20	M	12
popo_51	12	40	S	40	No	70.3		15	20	mss	18		7		3	10	MSS	9
popo_52	14	20	M	12	Yes	72		22	10	rmr	3		7		5	5	M	3
popo_53	9	40	S	40	Yes	76.7		12	25	mrms	15		6		5	40	S	40
popo_54	16	30	S	30	Yes	66		18	20	mrms	12		7		4	10	MSS	9
popo_56	21	40	S	40	Yes	79.3		19	25	s	25		7		3	15	M	9
popo_57	15	20	M	12	Yes	92.3		17	15	rmr	4.5		5		3	10	S	10
popo_58	10	70	S	70	No	71.3		12	40	s	40		8		4	30	MSS	27
popo_59	14	35	MSS	31.5	Yes	74.3		19	25	mss	22.5		7		3	5	M	3
popo_60	9	30	M	18	No	74.7		13	15	mss	13.5		9		5	35	S	35
popo_61	10	40	S	40	Yes	79.7		12	30	mss	27		10		5	20	M	12
popo_63	15	25	MS	20	Yes	70		20	25	mss	22.5		5		2	5	MSS	4.5
popo_66	10	25	M	15	No	82		13	20	mrms	12		8		5	18	MSS	16.2
popo_68	6	20	M	12	No	82.3		12	20	rmr	6		8		5	20	MSS	18
popo_69	9	35	MSS	31.5	Yes	92		8	25	mrms	15		5		5	20	MSS	18
popo_70	11	40	S	40	No	68.7		12	30	mss	27		3		4	10	S	10
popo_71	9	25	M	15	Yes	71.7		12	20	mrms	12		5		5	10	M	6
popo_72	20	15	MS	12	Yes	86.7		24	10	r	2		2		2	3	S	3
popo_73	13	25	MS	20	Yes	80.3		18	15	s	15		8		6	15	M	9
popo_74	10	25	MS	20	No	80		11	15	mrms	9		5		5	10	MS	8
popo_76	14	35	S	35	Yes	79		21	20	mss	18		7		3	10	S	10
popo_77	12	20	MR	8	Yes	89		18	15	mr	6		2		3	5	MSS	4.5
popo_78	10	35	S	35	No	74		15	20	ms	16		NA		5	10	M	6
popo_79	12	25	M	15	Yes	74.7		16	20	mrms	12		5		4	25	MSS	22.5
popo_81	14	45	S	45	No	81.7		21	25	s	25		4		2	15	MSS	13.5
popo_82	8	65	S	65	No	66.7		12	50	s	50		8		6	20	M	12
popo_83	9	65	S	65	No	84.3		14	45	s	45		8		4	40	S	40
popo_84	15	20	MSS	18	No	96.3		21	15	s	15		4		3	5	MSS	4.5
popo_85	6	65	S	65	Yes	79		12	70	s	70		6		5	10	MSS	9
popo_86	8	45	MSS	40.5	No	89		12	50	s	50		7		5	25	S	25
popo_87	18	25	MSS	22.5	Yes	79		27	10	s	10		4		3	5	MSS	4.5
popo_88	8	15	MR	6	No	78		15	15	mr	6		6		5	10	MSS	9
popo_90	16	25	MS	20	Yes	86.7		22	20	s	20		5		4	25	MSS	22.5
popo_91	8	45	MSS	40.5	No	77.3		18	25	s	25		8		5	10	M	6
popo_92	8	30	MS	24	No	77.3		12	25	mrms	15		10		5	10	M	6
popo_93	16	30	MSS	27	No	79		24	20	s	20		4		3	10	MSS	9
popo_94	10	20	M	12	No	71.7		12	25	mr	10		4		3	10	MSS	9
popo_95	12	35	MS	28	Yes	76.7		13	20	mrms	12		4		5	15	MSS	13.5
popo_96	17	25	MSS	22.5	Yes	84.7		27	20	mss	18		5		2	15	MSS	13.5
popo_97	12	20	M	12	Yes	88		21	15	mrms	9		4		4	20	S	20
popo_98	10	45	S	45	No	73.7		15	15	mrms	9		4		5	10	MSS	9
popo_101	12	30	MS	24	No	77.7		14	25	mrms	15		8		5	15	M	9
popo_102	13	35	S	35	No	72.7		15	30	mss	27		7		4	15	MSS	13.5
popo_103	12	30	MSS	27	No	76		12	25	mss	22.5		6		4	15	MSS	13.5
popo_104	14	25	MSS	22.5	No	72.7		18	15	mss	13.5		6		5	5	M	3
popo_105	6	40	S	40	No	78		12	35	mss	31.5		5		5	30	S	30
popo_106	11	30	MSS	27	No	81		12	30	mrms	18		7		5	15	MSS	13.5
popo_108	9	35	MSS	31.5	Yes	82.7		13	25	mrms	15		6		5	20	MSS	18
popo_109	15	25	M	15	No	84.3		19	10	mrms	6		9		3	5	MS	4
popo_110	12	25	M	15	No	79.3		19	10	mrms	6		4		4	1	RMR	0.3
popo_111	18	10	MR	4	No	84		21	10	mrms	6		8		3	5	MSS	4.5
romany_1	4	25	MSS	22.5	Yes	72.7		7	40	mrms	24		NA		6	5	MR	2
romany_2	4	20	M	12	Yes	70.7		7	20	rmr	6		6		5	5	M	3
romany_4	15	20	MR	8	Yes	71.7		25	5	r	1		7		4	10	MSS	9
romany_5	3	25	M	15	No	71.7		30	40	mrms	24		7		5	15	M	9
romany_6	9	20	M	12	No	75.3		13	15	mrms	9		8		4	15	M	9
romany_7	13	40	S	40	No	76.7		19	30	s	30		8		5	30	MSS	27
romany_8	3	20	MR	8	Yes	71.7		7	35	mrms	21		8		5	10	M	6
romany_9	10	20	MR	8	Yes	69.7		12	15	mrms	9		8		3	10	MSS	9
romany_10	3	15	M	9	Yes	74		2	40	mrms	24		8		6	15	M	9
romany_12	3	20	MR	8	Yes	71.7		6	35	mrms	21		7		5	10	RMR	3
romany_13	6	25	M	15	Yes	71.3		12	20	rmr	6		6		4	1	M	0.6
romany_14	23	30	M	18	Yes	70		14	15	rmr	4.5		8		1	5	M	3
romany_15	5	30	MS	24	No	75.7		7	30	mrms	18		7		5	10	MSS	9
romany_16	11	15	M	9	Yes	69		13	15	rmr	4.5		7		5	5	M	3
romany_18	18	25	MSS	22.5	Yes	67.7		18	20	s	20		10		3	5	MS	4
romany_19	8	15	M	9	Yes	75.7		8	20	rmr	6		7		5	5	MS	4
romany_20	5	30	MSS	27	Yes	73.3		7	25	s	25		8		4	30	MSS	27
romany_21	5	20	MS	16	Yes	70.7		6	30	mrms	18		10		5	15	M	9
romany_22	13	25	M	15	No	80.3		20	15	rmr	4.5		6		1	5	M	3
romany_23	23	0	R	0	No	63.7		30	0	R	0		6		2	1	MR	0.4
romany_24	6	45	MSS	40.5	No	72		8	65	s	65		7		5	30	S	30
romany_25	6	35	MSS	31.5	Yes	72.7		10	35	s	35		8		5	25	MSS	22.5
romany_26	5	25	M	15	Yes	63		9	20	rmr	6		10		5	25	MSS	22.5
romany_27	8	15	MR	6	Yes	67.5		9	15	rmr	4.5		8		4	5	M	3
romany_28	23	0	R	0	Yes	80.3		30	0	R	0		8		1	1	S	1
romany_29	21	0	R	0	Yes	75		28	5	r	1		7		3	5	MS	4
romany_30	23	10	MSS	9	No	68		30	15	s	15		8		1	1	MS	0.8
romany_31	6	25	MSS	22.5	Yes	68		6	55	mrms	33		8		5	10	M	6
romany_34	23	0	R	0	No	73.3		27	5	r	1		7		1	1	MR	0.4
romany_35	20	15	M	9	No	74.7		19	10	rmr	3		8		3	10	MSS	9
romany_37	2	15	M	9	No	83.7		10	15	rmr	4.5		7		5	5	RMR	1.5
romany_38	23	15	MSS	13.5	Yes	75.3		30	10	mr	4		4		1	1	MR	0.4
romany_39	3	20	M	12	Yes	74.7		5	30	mrms	18		8		5	15	M	9
romany_40	11	30	M	18	No	75.3		14	10	rmr	3		7		2	5	M	3
romany_41	9	25	M	15	No	69.7		12	15	rmr	4.5		10		3	10	M	6
romany_42	3	35	MSS	31.5	No	75.7		6	30	mrms	18		9		5	5	M	3
romany_43	4	35	MS	28	No	79.7		6	30	rmr	9		8		5	5	RMR	1.5
romany_44	13	15	MSS	13.5	Yes	72.3		19	20	mss	18		9		4	5	M	3
romany_45	12	25	M	15	No	74.3		14	15	rmr	4.5		9		1	1	M	0.6
romany_46	8	20	MR	8	No	90.3		11	20	rmr	6		7		5	5	RMR	1.5
romany_48	8	15	MR	6	Yes	75.7		10	20	rmr	6		8		5	5	M	3
romany_49	5	20	MR	8	No	78		8	25	mrms	15		8		4	5	M	3
romany_50	9	40	S	40	Yes	79.7		14	20	rmr	6		8		5	10	M	6
romany_51	4	35	MSS	31.5	Yes	82		7	45	s	45		8		6	15	MSS	13.5
romany_52	5	50	S	50	No	81.3		12	45	s	45		8		6	20	MSS	18
romany_53	12	25	M	15	Yes	76.3		15	10	mss	9		2		1	1	R	0.2
romany_54	9	40	S	40	Yes	72.3		12	20	mrms	12		7		6	5	RMR	1.5
romany_55	8	40	S	40	No	78.7		12	40	mrms	24		8		6	20	MS	16
romany_56	8	25	M	15	No	77.3		10	25	mrms	15		10		6	5	MS	4
romany_57	9	45	S	45	Yes	75.7		17	40	mss	36		9		6	30	MSS	27
romany_58	3	25	M	15	Yes	83.3		7	30	rmr	9		8		6	30	M	18
romany_59	18	15	M	9	Yes	74		10	20	rmr	6		8		3	20	MSS	18
romany_60	6	20	MR	8	No	85		11	15	rmr	4.5		10		5	10	M	6
romany_62	8	45	S	45	No	89		12	60	s	60		7		3	10	MSS	9
romany_63	3	20	M	12	Yes	77		2	35	rmr	10.5		NA		6	20	M	12
romany_64	3	30	MR	12	Yes	86.3		7	35	rmr	10.5		7		4	30	S	30
romany_65	3	15	MR	6	Yes	68		6	20	rmr	6		7		6	20	MSS	18
romany_66	23	15	MSS	13.5	No	64		30	5	mrms	3		10		4	20	S	20
romany_67	3	20	M	12	No	77.7		6	20	rmr	6		7		5	10	M	6
romany_68	5	30	MSS	27	No	83.3		11	25	rmr	7.5		10		2	0	R	0
romany_69	10	35	MSS	31.5	No	76.3		17	25	mss	22.5		10		3	15	MSS	13.5
romany_71	3	25	M	15	Yes	82.3		7	25	rmr	7.5		7		6	20	M	12
romany_72	11	30	MRMSS	21	No	72.3		15	30	mss	27		2		3	10	MS	8
romany_73	17	15	MR	6	Yes	83.3		21	5	r	1		7		3	5	MSS	4.5
romany_74	11	20	M	12	No	75.3		16	15	rmr	4.5		4		3	10	MSS	9
romany_75	9	20	M	12	Yes	77.7		11	15	mrms	9		6		3	5	MSS	4.5
romany_76	9	15	MR	6	Yes	84.7		12	15	rmr	4.5		7		4	15	MSS	13.5
romany_77	4	20	M	12	No	84		6	30	rmr	9		10		4	10	M	6
romany_79	20	5	MSS	4.5	Yes	69.7		21	10	mr	4		5		3	10	MSS	9
romany_80	2	25	M	15	No	84.7		6	30	rmr	9		10		6	40	S	40
romany_82	15	15	MR	6	No	82.7		22	10	mr	4		10		6	10	S	10
romany_83	13	20	MSS	18	No	77.3		20	10	mss	9		10		4	5	MSS	4.5
romany_84	13	20	M	12	Yes	85.3		11	10	mrms	6		6		2	5	MSS	4.5
romany_85	2	60	S	60	No	76.3		4	70	s	70		8		6	40	MSS	36
romany_86	9	25	MRMSS	17.5	Yes	81.3		10	15	mrms	9		7		6	30	MSS	27
romany_87	8	30	MSS	27	No	76.3		11	35	mss	31.5		8		3	10	MS	8
romany_88	2	15	MR	6	Yes	63.7		6	15	rmr	4.5		NA		6	10	M	6
romany_90	11	25	MSS	22.5	Yes	70.3		18	20	mrms	12		7		4	5	MS	4
romany_91	11	20	MSS	18	Yes	73.3		10	35	mss	31.5		NA		6	10	MS	8
romany_92	1	45	MSS	40.5	No	83.3		6	20	rmr	6		NA		6	40	MSS	36
romany_93	9	20	M	12	No	73		11	10	rmr	3		5		3	10	MSS	9
romany_94	4	30	M	18	Yes	80.3		10	30	mrms	18		8		6	50	MSS	45
romany_95	4	20	MR	8	Yes	77.3		6	20	rmr	6		10		6	30	M	18
romany_96	6	25	M	15	No	82.7		10	20	rmr	6		10		3	25	MSS	22.5
romany_97	8	20	MR	8	No	73.3		12	15	rmr	4.5		8		6	40	S	40
romany_98	4	15	MR	6	Yes	83.7		6	20	rmr	6		NA		6	40	S	40
romany_99	9	25	M	15	No	71		13	15	rmr	4.5		8		2	10	MSS	9
romany_101	4	20	MR	8	Yes	74.3		8	15	rmr	4.5		7		6	5	M	3
romany_102	4	35	MSS	31.5	Yes	76		10	45	s	45		7		3	15	MSS	13.5
romany_104	3	50	S	50	No	73.7		6	60	s	60		7		6	15	M	9
romany_105	14	20	MR	8	No	66.7		23	10	r	2		7		3	10	MSS	9
romany_106	3	45	S	45	No	71.7		3	45	s	45		5		6	10	M	6
romany_107	20	20	M	12	No	68		30	10	s	10		8		3	40	S	40
romany_109	2	45	MSS	40.5	Yes	72		3	60	s	60		8		4	40	MSS	36
romany_110	5	20	MR	8	No	91		10	15	mrms	9		5		4	10	M	6
romany_111	3	15	MR	6	No	77.3		6	20	rmr	6		6		6	10	MSS	9
romany_113	12	30	MS	24	No	78.3		15	25	s	25		6		3	15	S	15
romany_114	4	20	M	12	Yes	84		7	20	rmr	6		6		6	10	M	6
romany_115	3	35	MSS	31.5	No	74.3		3	40	mrms	24		NA		4	40	MSS	36
romany_116	11	30	M	18	No	74.7		14	25	s	25		NA		3	10	S	10
romany_117	12	40	MSS	36	Yes	75.7		15	30	s	30		8		4	15	M	9
romany_119	18	35	RMR	10.5	No	93		29	5	r	1		9		3	10	M	6
romany_120	8	35	MSS	31.5	Yes	80		9	45	s	45		7		4	5	RMR	1.5
romany_121	8	50	S	50	No	85.3		15	35	s	35		8		4	5	M	3
romany_122	18	15	RMR	4.5	No	79		25	10	r	2		8		3	5	MS	4
romany_123	10	10	MR	4	No	73.7		12	10	mrms	6		5		2	5	MS	4
romany_124	20	5	MS	4	Yes	66.7		24	10	r	2		6		4	10	MS	8
romany_125	8	45	S	45	No	73.7		12	40	mrms	24		10		3	30	MSS	27
romany_126	3	35	MSS	31.5	No	85		8	35	rmr	10.5		10		5	5	RMR	1.5
